# Supplementary material for: Integrated phytochemical analysis based on UHPLC-LTQ–Orbitrap and network pharmacology approaches to explore the potential mechanism of Lycium ruthenicum Murr. for ameliorating Alzheimer's disease
Source: Royal Society of Chemistry journal article supplement (doi:10.1039/c9fo02840d), 2020-01-01
Supplement: c9fo02840d3.xlsx [file c9fo02840d3.xlsx]

## Sheet: Sheet1
Title: Integrated phytochemical analysis based on UHPLC-LTQ-Orbitrap and network pharmacology approach to explore the potential mechanism of Lycium ruthenicum Murr. for alleviating Alzheimer's disease Authors: Yuanyuan Shi et al.
Table S2 Known therapeutic targets acting on AD
Known therapeutic targets from OMIM	Reference (PMID)	Known therapeutic targets from Drugbank	Reference (PMID)				Total known therapeutic targets after eliminating the redundancy	Reference (PMID)
APOE	30844401	GRIN3A	20016182				BACE1	10887202
DHCR24	11007892	GABBR1	30630900				APP	22801501
APP	22801501	IL1B	11260714				VSNL1	21823155
PSEN1	31386938	APP	22801501				VLDLR	21460838
HFE	17119292	CHRM1	15383745				VEGFA	9529250
NOS3	23952620	APH1A	28588301				UBXN4	16968747
PLAU	16825285	GABBR2	19002745				UBQLN1	21852239
A2M	26289409	ACHE	12783426				UBB	9422699
MPO	29296208	CHRNA7	18071042				TREM2	26374897
LRP1	28381441	CNR1	27828947				TP73	18786355
IL1A	23038715	PDE4	17353396				TGFBR2	17080199
PSEN2	30822634	BACE1	10887202				TGFB1	9335500
ACE	10643899						TF	15060098
AD5	10712207						STH	15136700
TREM2	26374897						SORL1	30911827
IDE	9830016						SORCS1	21280075
PIN1	10391244						SNCB	8194594
UBQLN1	21852239						SNCA	17955272
SORL1	30911827						SLC1A2	7694407
ADAM10	28409746						SIRT1	30510627
BECN1	18497889						SERPINA3	11941486
VLDLR	21460838						REST	31619788
ABCA7	26260791						RELN	26384575
MAPT	8673924						RCAN1	11483593
STH	15136700						RAGE	26175217
SIRT1	30510627						RABGAP1L	15367492
GSK3B	8994831						PTGDS	17404210
DBN1	8838578						PSEN2	30822634
BCHE	9302273						PSEN1	31386938
BACE1	10887202						PRKN	19483198
COMT	16027741						PRKCD	21068836
GRN	20142525						PLD3	30208929
GAB2	18272374						PLAU	16825285
HLA-A	11914421						PIN1	10391244
RCAN1	11483593						PIEZO1	31413369
CST3	15034766						PDE4D	17353396
CHAT	12759818						PDE4	17353396
TGFB1	9335500						OLR1	12807963
CALHM1	19472444						NRG1	16082692
HSPA9	28340952						NOS3	23952620
ITM2B	24026677						NOS2	16908860
ABCA2	15155565						NGB	11028983
MEOX2	16116430						NCSTN	11832221
OLR1	12807963						NCKAP1	10673335
VSNL1	21823155						MT-ND1	31734880
NCKAP1	10673335						MPO	29296208
CYP46A1	12533085						MOB2	11223154
GSK3A	12761548						MIR146A	18801740
MIR146A	18801740						MEOX2	16116430
CFH	18801740						MAPT	8673924
FGA	24821909						LRP1	28381441
UBB	9422699						LILRB2	24052308
COL25A1	15615705						KMO	21640374
HSD17B10	9851691						ITM2B	24026677
SLC1A2	7694407						IL1B	11260714
MAPT	8673924						IL1A	23038715
APBB1	11441186						IDE	9830016
APBB2	15714520						HSPA9	28340952
APBA2	19744962						HSD17B10	9851691
NCSTN	11832221						HMOX2	11144356
GGA3	17553422						HMOX1	11144356
FAS	11129341						HLA-A	11914421
TF	15060098						HFE	17119292
VEGFA	9529250						GSK3B	8994831
TGFBR2	17080199						GSK3A	12761548
ADRB2	17115048						GSAP	20811458
ATXN2	9989626						GRN	20142525
C9orf72	25977373						GRIN3A	20016182
PDE4D	17353396						GLO1	15128939
RAGE	26175217						GLNS	1361232
REST	31619788						GGA3	17553422
RELN	26384575						GBA	15525722
CASP4	19343227						GAPDHS	15507493
LILRB2	24052308						GABBR2	19002745
NGB	11028983						GABBR1	30630900
SORCS1	21280075						GAB2	18272374
GAPDHS	15507493						FGA	24821909
RABGAP1L	15367492						FAS	11129341
GLNS	1361232						EFHD2	24917152
GLO1	15128939						DHCR24	11007892
HMOX1	11144356						DBN1	8838578
HMOX2	11144356						CYP46A1	12533085
NRG1	16082692						CYP2D6	7574463
PRKCD	21068836						CST3	15034766
ACHE	12783426						CRH	7477348
CD40	11755016						COMT	16027741
BDNF	11729324						COL25A1	15615705
CAPN2	12070670						CNR1	27828947
C1QA	27033548						CHRNA7	18071042
C3	27033548						CHRM1	15383745
CRH	7477348						CHAT	12759818
CYP2D6	7574463						CFH	18801740
UBXN4	16968747						CD40LG	28405903
EFHD2	24917152						CD40	11755016
PTGDS	17404210						CCR2	17351623
SERPINA3	11941486						CASP4	19343227
GBA	15525722						CAPN2	12070670
SNCA	17955272						CALHM1	19472444
SNCB	8194594						C9orf72	25977373
TP73	18786355						C3	27033548
PRKN	19483198						C1QA	27033548
BHLHB9	15034937						BHLHB9	15034937
APBA3	10049767						BECN1	18497889
APBB3	9461550						BDNF	11729324
KMO	21640374						BCYRN1	29979260
BACE2	10965118						BCHE	9302273
CCR2	17351623						BACE2	10965118
CHRNA7	18071042						ATXN2	9989626
SNCA	7606927						APOE	30844401
NOS2	16908860						APH1A	28588301
ALOX5	21280074						APBB3	9461550
PIEZO1	31413369						APBB2	15714520
GSAP	20811458						APBB1	11441186
MOB2	11223154						APBA3	10049767
PLD3	30208929						APBA2	19744962
CD40LG	28405903						ALOX5	21280074
MT-ND1	31734880						ADRB2	17115048
BCYRN1	29979260						ADAM10	28409746
							AD5	10712207
							ACHE	12783426
							ACE	10643899
							ABCA7	26260791
							ABCA2	15155565
							A2M	26289409
