# Supplementary material for: Integrated phytochemical analysis based on UHPLC-LTQ–Orbitrap and network pharmacology approaches to explore the potential mechanism of Lycium ruthenicum Murr. for ameliorating Alzheimer's disease
Source: Royal Society of Chemistry journal article supplement (doi:10.1039/c9fo02840d), 2020-01-01
Supplement: c9fo02840d4.xlsx [file c9fo02840d4.xlsx]

## Sheet: Sheet1
Title: Integrated phytochemical analysis based on UHPLC-LTQ-Orbitrap and network pharmacology approach to explore the potential mechanism of Lycium ruthenicum Murr. for alleviating Alzheimer's disease Authors: Yuanyuan Shi et al.
Table S3 Interactions between putative targets for LRM and known therapeutic target for AD
Node1	Node2	Source	Combined Score		Node
SDHB	SDHC	String Database	0.999		SDHB
UQCRQ	UQCRH	String Database	0.999		UQCRQ
RPL37	RPL8	String Database	0.999		RPL37
RPL26L1	RPL3	String Database	0.999		RPL26L1
CYC1	UQCRFS1	String Database	0.999		CYC1
CYC1	UQCRC2	String Database	0.999		APH1A
APH1A	PSEN2	String Database	0.999		IKBKB
IKBKB	NFKBIA	String Database	0.999		SDHD
SDHD	SDHA	String Database	0.999		TUBA1B
TUBA1B	TUBA1A	String Database	0.999		LARS
LARS	EPRS	String Database	0.999		UQCRB
UQCRB	UQCRC1	String Database	0.999		RPL13A
RPL13A	RPL37	String Database	0.999		CFH
CFH	C3	String Database	0.999		RPL23A
RPL23A	RPL8	String Database	0.999		GPI
GPI	TPI1	String Database	0.999		EPRS
EPRS	DARS	String Database	0.999		B2M
B2M	HLA-A	String Database	0.999		RPL15
RPL15	RPL19	String Database	0.999		PRKAG2
PRKAG2	PRKAB2	String Database	0.999		PRKAA1
PRKAA1	PRKAB1	String Database	0.999		RPL23
RPL23	RPL11	String Database	0.999		KMO
KMO	KYNU	String Database	0.999		ATP5A1
ATP5A1	ATP5B	String Database	0.999		IARS
IARS	EPRS	String Database	0.999		PSEN2
PSEN2	NCSTN	String Database	0.999		HIF1A
UQCRQ	UQCRC1	String Database	0.999		GSK3B
HIF1A	HIF1AN	String Database	0.999		UQCRC2
GSK3B	AXIN1	String Database	0.999		PSENEN
RPL23A	RPL10L	String Database	0.999		RPL3
UQCRC2	UQCRC1	String Database	0.999		RPL10L
PSENEN	PSEN1	String Database	0.999		P4HB
RPL3	RPL10L	String Database	0.999		MT-CYB
PSENEN	NCSTN	String Database	0.999		PSEN1
RPL10L	RPL19	String Database	0.999		OAZ1
P4HB	CALR	String Database	0.999		GART
RPL23A	RPL15	String Database	0.999		UQCRH
RPL23A	RPL19	String Database	0.999		UQCR10
MT-CYB	UQCRH	String Database	0.999		PRKAG1
RPL23A	RPL13A	String Database	0.999		CD40
PSEN1	NCSTN	String Database	0.999		GCLM
RPL23	RPL10L	String Database	0.999		HBB
RPL26L1	RPL15	String Database	0.999		FARSA
UQCRB	UQCRH	String Database	0.999		ATP5C1
RPL3	RPL8	String Database	0.999		UQCRFS1
OAZ1	ODC1	String Database	0.999		MT-ND1
RPL23A	RPL11	String Database	0.999		NHP2L1
GART	PPAT	String Database	0.999		F2
RPL13A	RPL3	String Database	0.999		EGFR
RPL15	RPL37	String Database	0.999		RPL11
UQCRH	UQCRC2	String Database	0.999		TUBB
RPL23A	RPL3	String Database	0.999		NFKB1
SDHB	SDHA	String Database	0.999		APBB1
GART	PFAS	String Database	0.999		PAICS
UQCR10	UQCRH	String Database	0.999		ASS1
RPL13A	RPL11	String Database	0.999		IKBKG
UQCRB	UQCRQ	String Database	0.999		RPL8
PRKAG1	PRKAB1	String Database	0.999		SDHC
RPL23	RPL13A	String Database	0.999		PRKAA2
CD40	CD40LG	String Database	0.999		RXRB
RPL23A	RPL37	String Database	0.999		PRKAG3
RPL15	RPL10L	String Database	0.999		NCOA2
MT-CYB	CYC1	String Database	0.999		CHEK2
GCLM	GCLC	String Database	0.999		NCOA1
RPL3	RPL19	String Database	0.999		YARS
EPRS	KARS	String Database	0.999		RXRA
HBB	HBA1	String Database	0.999		CHUK
APH1A	PSEN1	String Database	0.999		HSPA5
UQCRB	UQCRFS1	String Database	0.999		CS
RPL10L	RPL8	String Database	0.999		BACE1
UQCRQ	UQCR10	String Database	0.999		CCR2
SDHD	SDHC	String Database	0.999		LSM6
IARS	KARS	String Database	0.999		IL1B
FARSA	FARSB	String Database	0.999		TGFBR2
UQCRQ	CYC1	String Database	0.999		ESR1
UQCRH	UQCRFS1	String Database	0.999		ALDH18A1
ATP5C1	ATP5B	String Database	0.999		HSP90AB1
UQCRFS1	UQCRC1	String Database	0.999		RARG
SDHD	SDHB	String Database	0.999		VEGFA
MT-ND1	MT-CYB	String Database	0.999		MTR
UQCRQ	UQCRFS1	String Database	0.999		ADA
NHP2L1	PPIH	String Database	0.999		TP53
RPL13A	RPL8	String Database	0.999		GANAB
F2	FGA	String Database	0.999		RELN
EGFR	EGF	String Database	0.999		APP
UQCRB	CYC1	String Database	0.999		EGLN2
UQCRQ	UQCRC2	String Database	0.999		PPIB
PRKAG1	PRKAB2	String Database	0.999		TPI1
UQCR10	UQCRFS1	String Database	0.999		PARS2
RPL13A	RPL10L	String Database	0.999		AKR1C1
RPL15	RPL8	String Database	0.999		CHEK1
RPL3	RPL15	String Database	0.999		OAZ2
RPL26L1	RPL23	String Database	0.999		LDHA
RPL23	RPL23A	String Database	0.999		PFAS
UQCRH	UQCRC1	String Database	0.999		KARS
PRKAA1	PRKAG1	String Database	0.999		PKIA
IKBKB	TNF	String Database	0.999		AXIN1
RPL11	RPL19	String Database	0.999		TNF
LARS	IARS	String Database	0.999		NFKB2
UQCRB	UQCRC2	String Database	0.999		NRG1
CYC1	UQCRH	String Database	0.999		GLUD2
RPL26L1	RPL8	String Database	0.999		PPARA
RPL11	RPL3	String Database	0.999		ADH1B
RPL11	RPL10L	String Database	0.999		MDH2
RPL23	RPL37	String Database	0.999		CFD
PRKAA1	PRKAB2	String Database	0.999		PARK2
MT-CYB	UQCRFS1	String Database	0.999		GMPS
TUBB	TUBA1B	String Database	0.999		CALM1
NFKB1	NFKBIA	String Database	0.999		IGF1
RPL11	RPL15	String Database	0.999		CALCA
UQCRQ	MT-CYB	String Database	0.999		SERPINA1
RPL23	RPL8	String Database	0.999		SRC
RPL13A	RPL15	String Database	0.999		RARB
APBB1	APP	String Database	0.999		HMGCR
PAICS	GART	String Database	0.999		VKORC1
HIF1A	EGLN1	String Database	0.999		SHMT1
ASS1	OTC	String Database	0.999		GRIN2B
IKBKG	IKBKB	String Database	0.999		HLA-A
PSENEN	APH1A	String Database	0.999		OAT
RPL23	RPL3	String Database	0.999		SPTLC1
UQCR10	UQCRC2	String Database	0.999		HSP90AA1
RPL8	RPL19	String Database	0.999		MASP2
APH1A	NCSTN	String Database	0.999		ALDOA
IKBKG	TNF	String Database	0.999		KAT5
SDHC	SDHA	String Database	0.999		RPS6KA3
UQCR10	CYC1	String Database	0.999		GRIN2A
RPL23	RPL15	String Database	0.999		ATP5B
PSENEN	PSEN2	String Database	0.999		DHFR
ATP5A1	ATP5C1	String Database	0.999		HAO1
RPL13A	RPL19	String Database	0.999		NAGS
RPL37	RPL19	String Database	0.999		DRD2
UQCRFS1	UQCRC2	String Database	0.999		AADAT
PRKAA2	PRKAB1	String Database	0.999		APOE
UQCRB	UQCR10	String Database	0.999		CASP3
RPL11	RPL8	String Database	0.999		GABBR1
RPL23	RPL19	String Database	0.999		NCOR2
CYC1	UQCRC1	String Database	0.999		HK1
PRKAA2	PRKAB2	String Database	0.999		ITM2B
UQCRB	MT-CYB	String Database	0.999		CCBL1
UQCR10	UQCRC1	String Database	0.999		GRIK2
RPL11	RPL37	String Database	0.999		IGF2R
MT-CYB	UQCR10	String Database	0.998		PTPN1
RXRB	RARA	String Database	0.998		PYCR1
PRKAA2	PRKAG2	String Database	0.998		MAPT
LARS	DARS	String Database	0.998		MTTP
PRKAG3	PRKAB1	String Database	0.998		FARS2
RPL10L	RPL37	String Database	0.998		HGS
NCOA2	PPARG	String Database	0.998		C4B
MT-CYB	UQCRC1	String Database	0.998		TUBA1A
CHEK2	TP53	String Database	0.998		CARS
PSEN2	PSEN1	String Database	0.998		KCNMB3
PRKAA1	PRKAG2	String Database	0.998		MAOB
PSEN1	APP	String Database	0.998		GLUD1
LARS	KARS	String Database	0.998		GRIA2
IKBKG	CHUK	String Database	0.998		GCLC
NCOA1	PPARG	String Database	0.998		ITPA
RPL26L1	RPL19	String Database	0.998		SNCA
YARS	EPRS	String Database	0.998		P4HA2
MT-CYB	UQCRC2	String Database	0.998		GRIK3
RPL26L1	RPL11	String Database	0.998		RXRG
RXRA	RARA	String Database	0.998		GGA3
PRKAA2	PRKAG1	String Database	0.998		GSR
IARS	DARS	String Database	0.998		UBB
CHUK	NFKBIA	String Database	0.998		RNASE3
RPL26L1	RPL23A	String Database	0.998		AGXT
HSPA5	CALR	String Database	0.998		APRT
PRKAG2	PRKAB1	String Database	0.998		CNR1
PRKAG3	PRKAB2	String Database	0.998		OAZ3
RPL3	RPL37	String Database	0.998		NOS3
NCOA1	RARB	String Database	0.997		TUBA1C
CS	MDH2	String Database	0.997		CBS
RPL13A	EPRS	String Database	0.997		ARG2
GPI	PGM1	String Database	0.997		GOT1
TUBA1B	TUBB2B	String Database	0.997		GLUL
BACE1	APP	String Database	0.997		ARF1
RPL26L1	RPL37	String Database	0.997		PRKAB2
GART	SHMT1	String Database	0.997		ABAT
CCR2	CCL2	String Database	0.997		KYNU
LSM6	NHP2L1	String Database	0.997		NOS2
IL1B	IL1A	String Database	0.997		PRKCA
RXRA	NCOA1	String Database	0.997		GRIA1
TGFBR2	TGFB1	String Database	0.997		TST
LSM6	PPIH	String Database	0.997		IDH2
RXRA	NCOA2	String Database	0.997		GLS2
RXRA	PPARG	String Database	0.997		PAH
IKBKG	NFKBIA	String Database	0.997		ACTA1
ESR1	NCOA1	String Database	0.997		GRIK4
ALDH18A1	OAT	String Database	0.997		PGM1
HSP90AB1	HSP90AA1	String Database	0.997		RSL24D1
RXRA	NCOR2	String Database	0.997		CAMK2A
CYC1	ATP5B	String Database	0.997		ADAM17
PRKAG3	PRKAA2	String Database	0.997		IDH1
RARG	RXRB	String Database	0.996		UCK2
VEGFA	HIF1A	String Database	0.996		PNP
PRKAG3	PRKAA1	String Database	0.996		AARS
MTR	MTRR	String Database	0.996		CTH
RPL26L1	RPL13A	String Database	0.996		FPGS
ADA	PNP	String Database	0.996		TUBB2B
GART	MTHFD1	String Database	0.996		ALOX5
PAICS	PPAT	String Database	0.996		ARG1
TP53	SIRT1	String Database	0.996		MAT1A
GANAB	CALR	String Database	0.996		MAPK14
RELN	VLDLR	String Database	0.995		CAD
TUBB	TUBA1A	String Database	0.995		WARS
MT-ND1	NDUFC2	String Database	0.995		HSPA9
APP	APOE	String Database	0.995		L3HYPDH
EGLN2	HIF1A	String Database	0.995		HCK
IKBKB	NFKB1	String Database	0.995		PRKCD
RXRA	THRB	String Database	0.995		GRIK1
TUBA1B	TUBA1C	String Database	0.995		BGLAP
ESR1	NCOA2	String Database	0.995		GRIN1
PPIB	LEPRE1	String Database	0.995		PPARG
TPI1	GAPDHS	String Database	0.995		TNFSF13B
PARS2	EPRS	String Database	0.995		PTGS2
AKR1C1	AKR1C3	String Database	0.995		HARS
CS	ACO2	String Database	0.995		LYZ
CHEK1	TP53	String Database	0.995		GAB2
OAZ2	ODC1	String Database	0.994		GLS
LDHA	LDHB	String Database	0.994		CST3
PFAS	PPAT	String Database	0.994		ACAN
KARS	DARS	String Database	0.994		HPGDS
NCOA1	ESR2	String Database	0.994		TARS
PKIA	PRKACA	String Database	0.994		PLOD2
AXIN1	GSK3A	String Database	0.994		SLC25A12
TNF	VCAM1	String Database	0.994		LARS2
NFKB2	NFKBIA	String Database	0.994		LRP2
NRG1	EGFR	String Database	0.994		AMY2A
GPI	G6PD	String Database	0.994		G6PD
GLUD2	GLUD1	String Database	0.994		CXCL10
APP	SORL1	String Database	0.994		FGA
CHUK	NFKB2	String Database	0.993		CTSB
VEGFA	NOS3	String Database	0.993		SYK
VEGFA	IGF1	String Database	0.993		THRB
PPARA	NCOA1	String Database	0.993		MGAM
ADH1B	ALDH2	String Database	0.993		COL1A1
ASS1	ASNS	String Database	0.993		GPT
PPARA	NCOR2	String Database	0.993		SDHA
MDH2	GOT2	String Database	0.993		DARS
VEGFA	TGFB1	String Database	0.993		FAS
CFD	C3	String Database	0.993		FBP1
VEGFA	EGF	String Database	0.993		APBA2
RPL26L1	RPL10L	String Database	0.993		TH
B2M	CALR	String Database	0.993		STMN4
PARK2	SNCA	String Database	0.992		PTGDS
GMPS	CTPS1	String Database	0.992		LEPRE1
CALM1	NOS2	String Database	0.992		A2M
PARK2	UBB	String Database	0.992		DBH
IGF1	EGF	String Database	0.992		TF
CALCA	PTH	String Database	0.992		PYCR2
SERPINA1	A2M	String Database	0.992		VARS
SRC	PTPN1	String Database	0.992		ESR2
TNF	NFKBIA	String Database	0.992		NAGK
RARB	RARA	String Database	0.992		GRIA3
IKBKG	TLR4	String Database	0.991		DRD3
HMGCR	SQLE	String Database	0.991		ADRA2C
VKORC1	GGCX	String Database	0.991		GPT2
SHMT1	MTHFD1	String Database	0.991		EGF
GRIN2B	GRIN1	String Database	0.991		ADRA2B
HLA-A	CALR	String Database	0.991		PDE4B
HIF1A	EGLN3	String Database	0.991		NPY
IKBKB	CHUK	String Database	0.991		TP73
OAT	ARG1	String Database	0.991		CXCR4
P4HB	HSPA5	String Database	0.991		PTK2B
SPTLC1	SPTLC2	String Database	0.991		AMY1A
HSP90AA1	NOS3	String Database	0.991		HTR7
CS	ATP5B	String Database	0.991		GOT2
MASP2	MBL2	String Database	0.99		CAPN2
ALDOA	TPI1	String Database	0.99		CHIT1
KAT5	TP53	String Database	0.99		FTCD
NCOA1	RARA	String Database	0.99		HTR1A
YARS	AARS	String Database	0.99		CCL8
RPS6KA3	MAPK1	String Database	0.99		GATM
SDHB	UQCRC2	String Database	0.99		OPRM1
GRIN2A	GRIN1	String Database	0.99		CPT2
B2M	HFE	String Database	0.99		PYGL
SRC	EGF	String Database	0.99		NFKBIA
ATP5B	ACO2	String Database	0.99		CSAD
ESR1	SRC	String Database	0.99		LCN2
DHFR	FPGS	String Database	0.99		DHCR24
HAO1	AGXT	String Database	0.99		GNMT
B2M	LILRB2	String Database	0.99		YARS2
TP53	MAPK14	String Database	0.99		ACE
HSP90AA1	TP53	String Database	0.99		SLC25A13
TUBB	TUBA4A	String Database	0.99		SCN5A
NAGS	OTC	String Database	0.99		F10
DRD2	SLC6A3	String Database	0.99		PCYT1B
IARS	AARS	String Database	0.99		ADRB2
AADAT	CCBL1	String Database	0.99		APBB2
HSP90AA1	EGFR	String Database	0.989		SKP1
APOE	LRP1	String Database	0.989		AKR1B1
VEGFA	MMP9	String Database	0.989		AMY2B
TNF	IL1B	String Database	0.989		ADSS
LARS	AARS	String Database	0.989		GRM8
CASP3	MAPK14	String Database	0.989		ADSSL1
APBB1	KAT5	String Database	0.989		GAD2
GMPS	APRT	String Database	0.989		PRKCB
GPI	HK1	String Database	0.989		FKBP1A
GABBR1	GABBR2	String Database	0.989		GNPDA1
NCOR2	RARA	String Database	0.989		CRAT
HK1	G6PD	String Database	0.989		BHMT
ITM2B	APP	String Database	0.989		ADRA1D
CCBL1	KYNU	String Database	0.988		CHRM2
OAT	ARG2	String Database	0.988		SLC18A2
EPRS	AARS	String Database	0.988		AASS
APP	ADAM10	String Database	0.988		LDHB
IARS	YARS	String Database	0.988		FARSB
GRIK2	GRIK5	String Database	0.988		PLAU
HIF1A	CA9	String Database	0.988		PPIG
DHFR	GART	String Database	0.988		DRD1
IGF2R	M6PR	String Database	0.988		CYP1A2
PTPN1	EGFR	String Database	0.988		NQO1
VEGFA	SRC	String Database	0.987		BCAT1
RXRA	RARG	String Database	0.987		XDH
ASS1	NAGS	String Database	0.987		C3
PYCR1	PYCRL	String Database	0.987		MMP9
MAPT	GSK3B	String Database	0.987		BDNF
AADAT	KMO	String Database	0.987		MME
MTTP	P4HB	String Database	0.987		ACE2
OAT	ODC1	String Database	0.987		ADAM10
ASS1	CAD	String Database	0.987		ADRB3
UQCRQ	NDUFC2	String Database	0.987		TOP2A
FARS2	FARSB	String Database	0.987		CROT
RXRA	RARB	String Database	0.987		ADRB1
HGS	UBB	String Database	0.986		TLR4
UQCRFS1	SDHA	String Database	0.986		PLD2
C4B	MASP2	String Database	0.986		GAD1
TUBA1A	TUBB2B	String Database	0.986		PLD1
ASS1	ADSS	String Database	0.986		PRKACA
RARG	NCOR2	String Database	0.986		IL1A
CARS	YARS	String Database	0.986		ACY1
KCNMB3	KCNMA1	String Database	0.986		DRD5
P4HB	PPIB	String Database	0.986		MAN1B1
RARG	NCOA1	String Database	0.986		UPP1
MAOB	COMT	String Database	0.986		SLC25A20
LARS	YARS	String Database	0.986		GRM4
GLUD1	GOT2	String Database	0.986		CAMP
GRIA2	GRIA4	String Database	0.986		EDNRA
GCLC	GSS	String Database	0.986		CTRB1
ITPA	ADSS	String Database	0.985		NCSTN
YARS	KARS	String Database	0.985		MPO
SNCA	APP	String Database	0.985		TRPV1
P4HA2	P4HB	String Database	0.985		P4HA1
GRIK3	GRIK5	String Database	0.985		TGFB1
NCOR2	RARB	String Database	0.985		AVPR1B
RXRG	RARA	String Database	0.985		ACACB
GGA3	IGF2R	String Database	0.985		NAGA
GSR	GSS	String Database	0.985		ABCC1
ESR1	NOS3	String Database	0.985		LEPREL1
TP53	MAPK1	String Database	0.985		IGLL5
UBB	IDE	String Database	0.985		NDUFC2
RNASE3	MPO	String Database	0.985		HDC
ATP5A1	UQCRC2	String Database	0.985		AKR1C3
CHUK	NFKB1	String Database	0.985		AOC3
CALM1	NOS3	String Database	0.985		EARS2
RARG	RARA	String Database	0.985		TAT
AGXT	AGXT2	String Database	0.984		CHAT
APRT	PNP	String Database	0.984		ADRA1A
NCOR2	HDAC8	String Database	0.984		TLR7
TNF	NOS2	String Database	0.984		MMP12
CNR1	DRD2	String Database	0.984		COMT
SRC	IGF1	String Database	0.984		VCAM1
ATP5C1	UQCRC2	String Database	0.984		PTH
OAZ3	ODC1	String Database	0.984		PTGFR
NOS3	ARG2	String Database	0.984		PTGS1
TUBA1C	TUBB2B	String Database	0.984		ADRA1B
SDHB	UQCRFS1	String Database	0.984		GRIN2C
CCBL1	KMO	String Database	0.984		RARA
TNF	MAPK14	String Database	0.984		CD40LG
CBS	CTH	String Database	0.984		OPRK1
SNCA	SLC6A3	String Database	0.983		GRM1
UQCRFS1	NDUFC2	String Database	0.983		GRM7
ARG2	ODC1	String Database	0.983		MTNR1A
NCOR2	PPARG	String Database	0.983		GRIA4
GOT1	GPT2	String Database	0.983		PLA2G1B
RXRG	PPARG	String Database	0.983		CTPS1
GLUL	GLUD1	String Database	0.983		HDAC8
IKBKB	NFKB2	String Database	0.983		REST
GGA3	BACE1	String Database	0.983		SRR
ARF1	GGA3	String Database	0.983		TARS2
CNR1	OPRD1	String Database	0.983		BECN1
DHFR	SHMT1	String Database	0.983		GRIN3A
RARG	RXRG	String Database	0.982		SGK1
NRG1	EGF	String Database	0.982		CDK6
TNF	PPARG	String Database	0.982		AVPR2
GRIN2B	BDNF	String Database	0.982		LEPREL2
GSK3B	TP53	String Database	0.982		CYP2B6
KMO	CCBL2	String Database	0.982		SELE
RXRB	RARB	String Database	0.982		IARS2
RXRB	PPARG	String Database	0.982		EGLN1
PRKAB2	PRKAB1	String Database	0.982		ASMT
ABAT	GAD2	String Database	0.982		PTGER3
KYNU	CCBL2	String Database	0.982		CRYZ
TNF	TNFSF13B	String Database	0.982		TAS1R2
AADAT	KYNU	String Database	0.982		P2RY12
NOS2	ARG2	String Database	0.981		ADRA2A
RPL11	RSL24D1	String Database	0.981		CES1
PRKCA	PLD1	String Database	0.981		PPIA
GRIA1	PRKCA	String Database	0.981		ASPA
YARS	CARS2	String Database	0.981		OPRD1
RPL8	RSL24D1	String Database	0.981		GABBR2
P4HB	P4HA1	String Database	0.981		HCRT
NCOR2	RXRG	String Database	0.981		ITPR1
ABAT	GAD1	String Database	0.981		CALR
LARS	CARS	String Database	0.981		VLDLR
TST	CTH	String Database	0.981		GJA1
PSEN2	APP	String Database	0.981		TACR1
IDH2	ACO2	String Database	0.981		BBOX1
SRC	HSP90AA1	String Database	0.981		HRH2
GLS2	TP53	String Database	0.98		CYP2D6
PAH	SPR	String Database	0.98		GANC
ACTA1	PFN1	String Database	0.98		PHOSPHO1
TUBA1A	TUBA4A	String Database	0.98		ALDH2
GRIK4	GRIK2	String Database	0.98		TFF2
GRIN2B	CAMK2A	String Database	0.98		COL25A1
PGM1	PYGL	String Database	0.98		CSNK2A1
PRKCA	GRIA2	String Database	0.98		LCT
IKBKG	NFKB1	String Database	0.98		PLA2G6
ITPA	ADSSL1	String Database	0.98		LTF
RSL24D1	RPL19	String Database	0.979		CYP2A6
CAMK2A	GRIN1	String Database	0.979		MAPK1
NCOR2	RXRB	String Database	0.979		SSTR2
ADAM17	EGF	String Database	0.979		SSTR5
HSP90AA1	MAPK1	String Database	0.979		PTGER1
IDH1	ACO2	String Database	0.979		ACO2
GOT1	GLUD1	String Database	0.979		TLR2
TNF	ADAM17	String Database	0.979		AVPR1A
UCK2	UPP1	String Database	0.979		CHD1
PNP	UPP1	String Database	0.979		PLOD3
SRC	MMP9	String Database	0.979		PIN1
AARS	SARS	String Database	0.979		LGSN
TNF	CD40LG	String Database	0.979		IFNB1
ESR1	HSP90AA1	String Database	0.979		MTNR1B
VEGFA	MMP2	String Database	0.979		HNF1A
LDHA	HIF1A	String Database	0.979		SERPINB3
VEGFA	EGFR	String Database	0.979		PDK2
DHFR	MTHFD1	String Database	0.979		PGAM2
ARG2	OTC	String Database	0.979		PTGIR
CTH	MTR	String Database	0.979		HEXB
PAH	TAT	String Database	0.978		RENBP
FPGS	MTHFD1	String Database	0.978		CHRM1
UQCR10	NDUFC2	String Database	0.978		PLD3
IL1B	MAPK14	String Database	0.978		APCS
GLUD2	GLUL	String Database	0.978		CDO1
TUBB2B	TUBA4A	String Database	0.978		OLR1
PGM1	PYGM	String Database	0.978		F13A1
ALOX5	LTA4H	String Database	0.978		OPLAH
UQCRC2	ATP5B	String Database	0.978		MMP7
ARG1	NOS2	String Database	0.978		NCKAP1
MAT1A	BHMT	String Database	0.978		CTSD
GOT1	GLUD2	String Database	0.978		IL4I1
ESR1	NCOR2	String Database	0.978		AGXT2
IKBKG	NFKB2	String Database	0.978		B4GALT1
TUBB	TUBA1C	String Database	0.978		IDE
HIF1A	TP53	String Database	0.977		PIK3CG
ARF1	PLD2	String Database	0.977		HMOX2
DHFR	SPR	String Database	0.977		PRSS1
RXRG	RARB	String Database	0.977		TYR
MTR	SHMT1	String Database	0.977		GAA
MAPK14	NFKBIA	String Database	0.977		LILRB2
EPRS	FARSB	String Database	0.977		SORL1
MTR	MTHFD1	String Database	0.976		PPARD
GPI	GCK	String Database	0.976		SOAT1
CAD	PPAT	String Database	0.976		BCAT2
MAT1A	MTR	String Database	0.976		UGT1A9
IL1B	NFKB1	String Database	0.976		PDE4A
ARG1	OTC	String Database	0.976		ACPP
IDH1	IDH2	String Database	0.976		ASRGL1
WARS	WARS2	String Database	0.976		VIMP
HIF1A	HSP90AA1	String Database	0.976		PAPSS1
PRKCA	PLD2	String Database	0.976		B4GALT3
GLUL	PPAT	String Database	0.976		B4GALT4
HSPA9	ATP5B	String Database	0.976		B4GALT2
CHEK1	CHEK2	String Database	0.976		AARS2
PAICS	PFAS	String Database	0.976		SLC6A3
L3HYPDH	DAO	String Database	0.975		MGMT
TNF	IFNG	String Database	0.975		DPP4
UQCRFS1	ATP5B	String Database	0.975		GSTM4
ARG1	ODC1	String Database	0.975		CACNA1A
HCK	EGFR	String Database	0.975		APBA3
CAMK2A	GRIN2A	String Database	0.975		DARS2
ALOX5	PTGS2	String Database	0.975		C1QA
PRKCD	PRKCB	String Database	0.975		PLA2G2A
GRIK1	GRIK5	String Database	0.975		UBQLN1
PYCR1	PYCR2	String Database	0.975		PDE4D
TP53	PIN1	String Database	0.975		C9orf72
BGLAP	GGCX	String Database	0.975		SLC5A2
EPRS	AARS2	String Database	0.975		MB
YARS	SARS	String Database	0.975		WARS2
GRIK4	GRIK3	String Database	0.975		PCYT1A
GRIN1	GRIN2D	String Database	0.975		NME1
PPARG	SIRT1	String Database	0.975		CARS2
SRC	NFKBIA	String Database	0.975		NPPB
SRC	MMP2	String Database	0.974		GLO1
PPARG	TP53	String Database	0.974		HFE
VEGFA	HSP90AA1	String Database	0.974		BACE2
GCLM	GSS	String Database	0.974		TLR9
SRC	NOS2	String Database	0.974		GSTP1
TNFSF13B	CD40LG	String Database	0.974		SLC6A4
CARS	EPRS	String Database	0.974		CPB1
PPARA	CPT1A	String Database	0.974		SLC1A2
PTGS2	IL1B	String Database	0.974		SDS
PRKCD	TP53	String Database	0.973		GSTM1
B2M	CST3	String Database	0.973		FGFR1
PYCR1	ALDH18A1	String Database	0.973		TREM2
CHUK	PRKCB	String Database	0.973		PSAT1
HARS	KARS	String Database	0.973		ACHE
ALOX5	PTGS1	String Database	0.973		ATP1A1
CS	SDHA	String Database	0.973		MTRR
HIF1A	EGFR	String Database	0.973		CCL2
LYZ	LTF	String Database	0.973		SLC25A29
GRIK4	GRIK1	String Database	0.973		ZMYND8
IARS	FARSB	String Database	0.973		SOAT2
GAB2	MAPK1	String Database	0.973		PCCB
GLUD2	GOT2	String Database	0.973		ISYNA1
GLS2	GLUL	String Database	0.973		IFNG
GLS	GLUL	String Database	0.972		SLC1A1
TNF	CHUK	String Database	0.972		PDE5A
CST3	CTSD	String Database	0.972		GSTA1
IKBKB	PRKCB	String Database	0.972		NFS1
ACAN	MMP2	String Database	0.972		FHIT
HPGDS	GSR	String Database	0.972		SLC18A1
MAPK14	HMOX1	String Database	0.972		ABO
TARS	SARS	String Database	0.972		GRIN2D
YARS	YARS2	String Database	0.972		EFTUD1
PLOD2	PLOD1	String Database	0.972		ASPH
SDHB	CS	String Database	0.972		PLA2G2E
SLC25A12	ACO2	String Database	0.972		PADI4
LARS2	YARS	String Database	0.972		GIG25
GRIN1	GRIN2C	String Database	0.972		MBL2
CARS	IARS	String Database	0.971		HMOX1
NCOA2	ESR2	String Database	0.971		DBN1
LRP2	APOE	String Database	0.971		PREP
AMY2A	SI	String Database	0.971		SI
GPI	GAPDHS	String Database	0.971		DNPEP
G6PD	TPI1	String Database	0.971		ABCC8
NCOR2	THRB	String Database	0.971		RCAN1
TNF	CCL2	String Database	0.971		ABCA2
TP53	CSNK2A1	String Database	0.971		PPAT
CXCL10	CCR2	String Database	0.971		CA9
FGA	F13A1	String Database	0.971		SLC1A7
F2	GGCX	String Database	0.971		SELP
AMY2A	MGAM	String Database	0.971		OGFOD1
GRIN1	GRIN3A	String Database	0.971		CCBL2
ESR1	MAPK1	String Database	0.971		GLRA1
CTSB	CTSD	String Database	0.97		MMP2
GRIA1	CAMK2A	String Database	0.97		ABCA7
SYK	GAB2	String Database	0.97		METAP2
THRB	RXRG	String Database	0.97		GATB
MGAM	AMY1A	String Database	0.97		CRH
CAMK2A	CALM1	String Database	0.97		ECE1
COL1A1	MMP2	String Database	0.97		SLC7A11
NCOA1	THRB	String Database	0.97		ALDH1A1
ESR1	IGF1	String Database	0.97		CYP2C9
GPT	GOT1	String Database	0.97		CASP4
SDHA	ATP5B	String Database	0.97		HIF1AN
C4B	MBL2	String Database	0.97		ANG
ATP5A1	HSPA9	String Database	0.97		THNSL1
DARS	AARS	String Database	0.97		ATXN2
FAS	TP53	String Database	0.97		FABP6
FBP1	GPI	String Database	0.969		RNASE1
IGF1	TGFB1	String Database	0.969		SLC25A18
GPI	ALDOA	String Database	0.969		BCHE
APBA2	APP	String Database	0.969		SLC5A1
HARS	AARS	String Database	0.969		SMARCA5
TH	SPR	String Database	0.969		SLC38A3
STMN4	TUBB2B	String Database	0.969		SCN4A
HIF1A	NOS3	String Database	0.969		BHMT2
PTGDS	PTGS2	String Database	0.968		ETFDH
RPL15	RSL24D1	String Database	0.968		REN
MAPT	CASP3	String Database	0.968		SLC7A1
ARF1	PLD1	String Database	0.968		APBB3
TNF	NFKB1	String Database	0.968		GRID2
LEPRE1	COL1A1	String Database	0.968		SLC7A8
EPRS	CARS2	String Database	0.968		SLC23A1
A2M	MMP2	String Database	0.968		SLC25A15
NCOA1	NCOR2	String Database	0.968		NQO2
DBH	COMT	String Database	0.968		CTSF
UQCRH	NDUFC2	String Database	0.967		ATOX1
TF	C3	String Database	0.967		SQLE
A2M	APP	String Database	0.967		LGALS7
RXRA	RXRG	String Database	0.967		KCNMA1
MAPT	TUBA1B	String Database	0.967		CHRNA7
GRIN2B	NRG1	String Database	0.967		CYP46A1
GRIA1	GRIA2	String Database	0.967		SLC6A14
PYCR2	PYCRL	String Database	0.967		NAGLU
CYC1	SDHA	String Database	0.967		CA2
VARS	EPRS	String Database	0.967		OGFOD2
ESR2	NOS3	String Database	0.967		POX2
ARF1	COPG1	String Database	0.966		PLEKHA1
ESR1	HSP90AB1	String Database	0.966		NADSYN1
CAMK2A	GRIA2	String Database	0.966		PAEP
SERPINA1	TF	String Database	0.966		TOP2B
GRIN1	CALM1	String Database	0.966		ODC1
HLA-A	LILRB2	String Database	0.966		SLC22A5
ATP5A1	UQCRFS1	String Database	0.966		SLC36A1
DHFR	MTR	String Database	0.966		SNCB
NAGK	RENBP	String Database	0.966		SLC6A2
GRIA3	GRIA2	String Database	0.966		ABCG2
DRD3	CNR1	String Database	0.966		TMLHE
ADRA2C	NPY	String Database	0.966		STH
GPT2	GLUD1	String Database	0.966		PPIF
ATP5C1	UQCRFS1	String Database	0.966		SLC1A4
ALDOA	GAPDHS	String Database	0.966		PTGR1
CALCA	CRH	String Database	0.966		MOK
EGF	TGFB1	String Database	0.965		ALKBH2
EGFR	MAPK1	String Database	0.965		P4HTM
HGS	EGFR	String Database	0.965		XRCC4
IDH2	GLUD1	String Database	0.965		MSRA
ADRA2B	NPY	String Database	0.965		LRP1
CNR1	DRD4	String Database	0.965		PIM1
PDE4B	PRKACA	String Database	0.965		ALKBH3
NPY	ADRA2A	String Database	0.965		CHRNA10
SRC	ESR2	String Database	0.965		ACADSB
TP73	SIRT1	String Database	0.965		PPIH
HSP90AA1	HSPA5	String Database	0.965		SARS
CXCR4	CXCL10	String Database	0.965		SLC1A3
NCOA2	RARA	String Database	0.964		KCNH2
GPT2	GOT2	String Database	0.964		SLC1A6
TARS	IARS	String Database	0.964		CA3
ATP5A1	UQCRC1	String Database	0.964		HBA1
LARS	VARS	String Database	0.964		GBA
GPI	LDHB	String Database	0.964		SFTPD
YARS	FARSA	String Database	0.964		GRIK5
GOT1	MDH2	String Database	0.964		SPR
PTK2B	SRC	String Database	0.964		SIGLEC1
GRIN1	GRIA2	String Database	0.964		RPL19
AMY1A	SI	String Database	0.964		HIBCH
GABBR1	HTR1A	String Database	0.964		POLB
NCOA2	NCOR2	String Database	0.964		NAGPA
KARS	AARS	String Database	0.964		NGB
HARS	YARS	String Database	0.964		KLK7
MGAM	AMY2B	String Database	0.964		SLC7A3
F2	F13A1	String Database	0.964		TK1
LARS2	YARS2	String Database	0.964		SLC7A4
IDH1	PGM1	String Database	0.964		ENPEP
HTR7	CALCA	String Database	0.964		VSNL1
EGFR	TP53	String Database	0.964		TRPM7
G6PD	GSR	String Database	0.964		CALHM1
MAT1A	BHMT2	String Database	0.964		GCK
SRC	EGFR	String Database	0.963		TRDMT1
ACAN	MMP9	String Database	0.963		RHO
GOT2	ASNS	String Database	0.963		GAPDHS
CAPN2	MAPK1	String Database	0.963		PROSC
GMPS	PFAS	String Database	0.963		NUDT9
SRC	MAPK1	String Database	0.963		SLC6A7
ATP5C1	UQCRC1	String Database	0.963		SIGLEC7
CHIT1	LYZ	String Database	0.963		HAL
SHMT1	AGXT	String Database	0.963		RORB
SERPINA1	C3	String Database	0.963		FOLH1
SDHB	CYC1	String Database	0.962		CA4
TH	TYR	String Database	0.962		CPT1A
FTCD	MTHFD1	String Database	0.962		EFHD2
PPARA	CPT2	String Database	0.962		ABCB5
APP	TGFB1	String Database	0.962		LCMT1
HTR1A	SLC6A4	String Database	0.962		MEOX2
GPT	GOT2	String Database	0.962		AZGP1
PLOD2	COL1A1	String Database	0.962		PAM
FBP1	ALDOA	String Database	0.962		GSS
IGF1	MAPK1	String Database	0.962		PGLYRP3
DBH	TH	String Database	0.962		COPG1
CCL8	CCR2	String Database	0.962		BHLHB9
GATM	ARG2	String Database	0.962		SORCS1
CAMK2A	MAPT	String Database	0.962		TUBA4A
ESR1	MAPK14	String Database	0.962		PPIC
OPRM1	NPY	String Database	0.962		CA1
GRIA3	CAMK2A	String Database	0.962		CA6
CNR1	ADRA2A	String Database	0.962		PYGM
CHEK1	KAT5	String Database	0.962		TGM3
OPRM1	GABBR1	String Database	0.962		LTA4H
NPY	CNR1	String Database	0.961		GLT6D1
CTH	BHMT	String Database	0.961		OTC
CPT2	CRAT	String Database	0.961		EGLN3
NCOA2	PPARA	String Database	0.961		UQCRC1
P4HB	LEPREL1	String Database	0.961		PRKAB1
PYGL	PYGM	String Database	0.961		MTHFD1
NFKBIA	MAPK1	String Database	0.961		SIRT1
HAO1	DAO	String Database	0.961		GSK3A
PRKCD	MAPK1	String Database	0.961		ASNS
HSPA9	ACO2	String Database	0.961		GGCX
ADRA2C	CNR1	String Database	0.961		SPTLC2
ABAT	GLUL	String Database	0.961		M6PR
CSAD	CDO1	String Database	0.96		PYCRL
GABBR1	CNR1	String Database	0.96		PFN1
IKBKB	TLR4	String Database	0.96		DAO
GMPS	ITPA	String Database	0.96		PLOD1
LCN2	LTF	String Database	0.96		DRD4
CAMK2A	GRIA4	String Database	0.96		PHYKPL
IGF1	MMP2	String Database	0.96		CPA1
SYK	TREM2	String Database	0.96		POLK
DHCR24	SQLE	String Database	0.96		LGALS1
GLS2	GLUD1	String Database	0.96		MIF
GART	MTR	String Database	0.959		CHRM3
HTR1A	GABBR2	String Database	0.959		GRN
ESR2	HSP90AA1	String Database	0.959		GRIN3B
APOE	C3	String Database	0.959		CDIPT
SDHA	UQCRC1	String Database	0.959		RBP1
GNMT	SHMT1	String Database	0.959		EPX
ESR1	CTSD	String Database	0.959		PHYH
PRKCA	EGFR	String Database	0.959		UBXN4
SRC	FAS	String Database	0.959		REG1A
ACAN	MMP7	String Database	0.959		MAN2A1
ATP5A1	MDH2	String Database	0.959		CTDSP1
SRC	F2	String Database	0.959		GRID1
COL1A1	PLOD1	String Database	0.959		GSTZ1
CST3	APOE	String Database	0.959		GSAP
ATP5B	UQCRC1	String Database	0.959		CA7
YARS2	AARS	String Database	0.959		ACCS
GLS	GLUD1	String Database	0.959		SLC25A22
ACE	REN	String Database	0.959		SLC7A2
SHMT1	FTCD	String Database	0.959		ACY3
SLC25A13	ACO2	String Database	0.959		PDE9A
YARS2	WARS2	String Database	0.959		C8G
PPARA	NFKBIA	String Database	0.959		HSD17B10
SCN5A	CALM1	String Database	0.959		RTCB
G6PD	GCK	String Database	0.959		APPBP2
F10	GGCX	String Database	0.959		SLC22A4
GOT1	CAD	String Database	0.959		ADAM28
ATP5C1	MDH2	String Database	0.959		SLC19A3
PCYT1B	PCYT1A	String Database	0.959		LCTL
GRIA1	GRIN2A	String Database	0.959		S100P
ADRB2	PTH	String Database	0.958		STK17B
ALDH18A1	GLUD2	String Database	0.958		NCAN
APBB2	APP	String Database	0.958		SLC25A2
IKBKG	TLR2	String Database	0.958		UGT3A1
PPARG	NFKB1	String Database	0.958		CA5A
PSEN1	BACE1	String Database	0.958		PIEZO1
GRIN2B	RELN	String Database	0.958		LGALS2
NCOA2	NCOA1	String Database	0.958		NEU2
HARS	EPRS	String Database	0.958		RABGAP1L
SKP1	NFKBIA	String Database	0.958		CA12
MDH2	ATP5B	String Database	0.958		GLTP
ATP5A1	SDHA	String Database	0.958		CPQ
RPL23A	RSL24D1	String Database	0.958		LCMT2
LCN2	CAMP	String Database	0.958		MOB2
PRKCD	SRC	String Database	0.958		CA14
RXRA	PPARA	String Database	0.958
PTK2B	EGFR	String Database	0.957
ALDOA	PGM1	String Database	0.957
NPY	OPRK1	String Database	0.957
NPY	DRD2	String Database	0.957
SERPINA1	FGA	String Database	0.957
GRIA1	GRIN1	String Database	0.957
SYK	NFKBIA	String Database	0.957
ARG1	NOS3	String Database	0.957
AKR1B1	SPR	String Database	0.957
NPY	HTR1A	String Database	0.957
C4B	C1QA	String Database	0.957
PRKCA	NFKBIA	String Database	0.957
AGXT	DAO	String Database	0.957
AMY2B	SI	String Database	0.957
GABBR1	DRD2	String Database	0.957
BGLAP	PTH	String Database	0.957
RPL3	RSL24D1	String Database	0.957
YARS	WARS	String Database	0.957
TNF	TLR4	String Database	0.957
ADSS	CAD	String Database	0.957
GRM8	SSTR5	String Database	0.957
EGF	ADAM10	String Database	0.957
ADSSL1	CAD	String Database	0.957
HTR7	CRH	String Database	0.957
TST	NFS1	String Database	0.957
ALDH18A1	GLUD1	String Database	0.957
GART	FTCD	String Database	0.956
GABBR1	OPRD1	String Database	0.956
PRKCA	SRC	String Database	0.956
THRB	RXRB	String Database	0.956
PPARA	HSP90AA1	String Database	0.956
NPY	OPRD1	String Database	0.956
TARS	YARS	String Database	0.956
OAT	OTC	String Database	0.956
GRIN2B	GRIA2	String Database	0.956
GAD2	GAD1	String Database	0.956
ASS1	ADSSL1	String Database	0.956
ALDH18A1	GLUL	String Database	0.956
NPY	GRM8	String Database	0.956
CST3	APP	String Database	0.956
SNCA	UBB	String Database	0.956
GABBR1	OPRK1	String Database	0.956
PRKCB	GRIA2	String Database	0.956
HBB	CAMP	String Database	0.955
RXRA	PPARD	String Database	0.955
B2M	LCN2	String Database	0.955
FKBP1A	PIN1	String Database	0.955
GNPDA1	GPI	String Database	0.955
LARS	IARS2	String Database	0.955
MDH2	UQCRC1	String Database	0.955
CRAT	DAO	String Database	0.955
BHMT	BHMT2	String Database	0.955
IDH2	GOT2	String Database	0.955
SHMT1	SDS	String Database	0.955
CHEK2	KAT5	String Database	0.955
CS	HSPA9	String Database	0.955
HIF1A	NCOA1	String Database	0.955
GRIN2B	GRIA1	String Database	0.955
GPT2	GLUD2	String Database	0.955
ADRA1D	AVPR1A	String Database	0.955
YARS	WARS2	String Database	0.955
CHRM2	GRM8	String Database	0.954
TARS	EPRS	String Database	0.954
GRIN1	GRIA4	String Database	0.954
SRC	ACTA1	String Database	0.954
SLC18A2	SLC6A3	String Database	0.954
HSP90AA1	EGF	String Database	0.954
SDHB	MDH2	String Database	0.954
RELN	GRIN2A	String Database	0.954
STMN4	TUBA1A	String Database	0.954
SERPINA1	TGFB1	String Database	0.954
NFKB1	MAPK1	String Database	0.954
SDHC	ATP5C1	String Database	0.954
AASS	PHYKPL	String Database	0.953
FBP1	HK1	String Database	0.953
ESR1	KAT5	String Database	0.953
PRKCD	CASP3	String Database	0.953
IKBKB	TLR2	String Database	0.953
SRC	HSP90AB1	String Database	0.953
GMPS	EPRS	String Database	0.953
YARS	DARS	String Database	0.953
NOS2	NFKBIA	String Database	0.953
G6PD	PGM1	String Database	0.953
UQCRB	NDUFC2	String Database	0.953
SYK	SRC	String Database	0.953
EPRS	IARS2	String Database	0.953
SYK	PIK3CG	String Database	0.953
ATP5A1	CYC1	String Database	0.953
LDHB	G6PD	String Database	0.952
FARSB	AARS	String Database	0.952
ASS1	NOS3	String Database	0.952
PPIB	COL1A1	String Database	0.952
PTK2B	SYK	String Database	0.952
PLAU	F2	String Database	0.952
GPT	GLUD1	String Database	0.952
HK1	PGM1	String Database	0.952
GNPDA1	HK1	String Database	0.952
PPIG	CYP2C9	String Database	0.952
DRD1	CRH	String Database	0.952
CYP1A2	PPIG	String Database	0.952
PRKCD	NOS3	String Database	0.952
NCOR2	MAPK1	String Database	0.952
NQO1	HMOX1	String Database	0.952
IDH2	GLUD2	String Database	0.952
P4HB	COL1A1	String Database	0.952
UQCRC2	SDHA	String Database	0.951
DHFR	AKR1B1	String Database	0.951
PPARA	MAPK1	String Database	0.951
GRIN2A	GRIA2	String Database	0.951
PLAU	EGFR	String Database	0.951
A2M	IGF1	String Database	0.951
BCAT1	CTH	String Database	0.951
GLS	CAD	String Database	0.951
TNF	PPARA	String Database	0.951
XDH	PNP	String Database	0.951
C3	MPO	String Database	0.951
DBH	MAOB	String Database	0.951
HSP90AB1	NOS3	String Database	0.951
STMN4	TUBA1B	String Database	0.951
ALDH18A1	PYCR2	String Database	0.951
CAMK2A	GRIN2C	String Database	0.951
PTGS2	HPGDS	String Database	0.951
GRIA3	GRIN1	String Database	0.951
PTPN1	EGF	String Database	0.951
PTGDS	PTGS1	String Database	0.951
GABBR1	DRD4	String Database	0.95
IL1B	CCL2	String Database	0.95
UBB	TP53	String Database	0.95
EPRS	FARSA	String Database	0.95
TUBA1C	TUBA4A	String Database	0.95
UQCRQ	ATP5C1	String Database	0.95
LYZ	MPO	String Database	0.95
GPI	PGAM2	String Database	0.95
MMP9	MMP7	String Database	0.95
IDH1	GOT2	String Database	0.95
A2M	FGA	String Database	0.95
APP	MAPK1	String Database	0.95
SERPINA1	APOE	String Database	0.95
CAD	ASNS	String Database	0.95
BDNF	TP53	String Database	0.95
MME	ACE2	String Database	0.95
ACE2	REN	String Database	0.95
LARS2	LARS	String Database	0.95
IGF1	APP	String Database	0.95
PPARA	RXRB	String Database	0.95
GRIN2B	GRIN3A	String Database	0.95
GGA3	APP	String Database	0.95
ADAM10	APOE	String Database	0.95
GRIA1	GRIN2C	String Database	0.95
DRD3	GABBR1	String Database	0.95
DRD2	SSTR5	String Database	0.95
ADRB3	CRH	String Database	0.949
ADRB2	PTGER1	String Database	0.949
GAD2	GLUL	String Database	0.949
NRG1	ADAM17	String Database	0.949
NPY	GABBR1	String Database	0.949
TOP2A	CHEK1	String Database	0.949
CROT	HAO1	String Database	0.949
IKBKB	CD40	String Database	0.949
ADRB1	CRH	String Database	0.949
HSP90AA1	HSPA9	String Database	0.949
ADRB3	CALCA	String Database	0.949
GRIN2A	GRIN3A	String Database	0.949
ADRB2	CRH	String Database	0.949
APP	EGF	String Database	0.949
TUBB	HSP90AA1	String Database	0.949
SDHB	ATP5C1	String Database	0.949
PRKCA	GRIA4	String Database	0.949
MAPT	APP	String Database	0.949
TLR4	CHUK	String Database	0.949
COL1A1	PLOD3	String Database	0.949
PPARG	TGFB1	String Database	0.948
HSP90AA1	UBB	String Database	0.948
MAPK14	NFKB1	String Database	0.948
ADRB1	CALCA	String Database	0.948
PLD2	MAPK1	String Database	0.948
HSP90AA1	TUBA1A	String Database	0.948
NPY	DRD3	String Database	0.948
CD40	NFKB1	String Database	0.948
HCK	IGLL5	String Database	0.948
GAD1	GLUL	String Database	0.948
GRIA3	GRIA4	String Database	0.948
GPT	GLUD2	String Database	0.948
GRIN2A	GRIA4	String Database	0.948
ESR1	TP53	String Database	0.948
GATM	ARG1	String Database	0.948
CHEK1	TP73	String Database	0.948
RXRB	PPARD	String Database	0.948
PLD1	SNCA	String Database	0.948
TP73	TP53	String Database	0.948
PRKACA	ITPR1	String Database	0.948
CD40	CHUK	String Database	0.947
SRC	VCAM1	String Database	0.947
P4HA2	COL1A1	String Database	0.947
NFKB2	NFKB1	String Database	0.947
GRIA1	GRIA4	String Database	0.947
IL1A	NFKB1	String Database	0.947
PPARA	RXRG	String Database	0.947
CD40	NFKBIA	String Database	0.947
P4HB	LEPRE1	String Database	0.947
NPY	DRD4	String Database	0.947
AGXT	SDS	String Database	0.947
PTGDS	HPGDS	String Database	0.947
ACY1	OTC	String Database	0.947
CTH	CDO1	String Database	0.947
CALCA	ADRB2	String Database	0.947
CAD	GOT2	String Database	0.947
DRD5	CRH	String Database	0.946
MAN1B1	GANAB	String Database	0.946
CTH	BCAT2	String Database	0.946
UPP1	TK1	String Database	0.946
MAOB	CYP2D6	String Database	0.946
SLC25A20	CRAT	String Database	0.946
GABBR1	ADRA2A	String Database	0.946
GRM4	HTR1A	String Database	0.946
PLAU	FGA	String Database	0.946
TNF	TLR2	String Database	0.946
HARS	TARS	String Database	0.946
CAMP	LTF	String Database	0.946
B2M	LYZ	String Database	0.946
FKBP1A	TGFB1	String Database	0.946
NFKB2	IL1B	String Database	0.946
MDH2	CYC1	String Database	0.946
IDH1	MMP9	String Database	0.946
MDH2	GLUD1	String Database	0.946
RXRG	PPARD	String Database	0.946
TP73	PIN1	String Database	0.946
EDNRA	PTGER1	String Database	0.946
TP73	KAT5	String Database	0.946
GRIN2B	GRIA4	String Database	0.946
OPRM1	OPRD1	String Database	0.945
DRD2	GRM7	String Database	0.945
PAH	DHFR	String Database	0.945
LRP2	M6PR	String Database	0.945
CTRB1	CPA1	String Database	0.945
PRKCB	EGFR	String Database	0.945
NCSTN	APP	String Database	0.945
GRIA3	GRIA1	String Database	0.945
YARS	FARSB	String Database	0.945
PARS2	IARS2	String Database	0.945
GABBR1	TAS1R2	String Database	0.945
PTK2B	PRKCD	String Database	0.945
OAZ1	OAZ3	String Database	0.945
YARS	IARS2	String Database	0.945
LDHA	GPI	String Database	0.945
CARS	SARS	String Database	0.945
UBB	EGFR	String Database	0.945
FGA	APCS	String Database	0.945
FGA	C3	String Database	0.945
PRKCA	EGF	String Database	0.945
CHUK	TLR2	String Database	0.945
TNF	IL1A	String Database	0.944
CAPN2	APP	String Database	0.944
CASP3	TP53	String Database	0.944
SRC	SNCA	String Database	0.944
SRC	PLAU	String Database	0.944
CTH	GOT2	String Database	0.944
CTH	SDS	String Database	0.944
DHFR	FTCD	String Database	0.944
F2	APP	String Database	0.944
MPO	MAPK1	String Database	0.944
LDHB	GOT1	String Database	0.944
TRPV1	CNR1	String Database	0.944
MMP9	CTSD	String Database	0.944
GOT1	ASNS	String Database	0.944
GMPS	GART	String Database	0.944
P4HA1	COL1A1	String Database	0.944
TGFB1	MAPK1	String Database	0.944
TNF	MMP9	String Database	0.944
VEGFA	F13A1	String Database	0.944
AVPR1B	EDNRA	String Database	0.944
ADRA2B	GABBR1	String Database	0.943
ACACB	CPT1A	String Database	0.943
GRIA3	GRIN2A	String Database	0.943
CPT2	SLC25A20	String Database	0.943
CYC1	HSPA9	String Database	0.943
DRD2	DRD4	String Database	0.943
NAGA	HEXB	String Database	0.943
IKBKG	UBB	String Database	0.943
F10	FGA	String Database	0.943
GRM4	DRD2	String Database	0.943
GLUL	CAD	String Database	0.943
PGM1	TPI1	String Database	0.943
ARF1	M6PR	String Database	0.943
ESR1	EGFR	String Database	0.943
ABCC1	ABCG2	String Database	0.943
MAOB	AOC3	String Database	0.943
LEPREL1	PPIB	String Database	0.943
ALDOA	LTA4H	String Database	0.943
IGLL5	SYK	String Database	0.943
VEGFA	APP	String Database	0.943
ADRA2C	GABBR1	String Database	0.943
PRKCA	RARA	String Database	0.943
PRKCD	SNCA	String Database	0.942
NDUFC2	UQCRC2	String Database	0.942
GSK3B	SKP1	String Database	0.942
DRD2	GABBR2	String Database	0.942
PRKAA2	ACACB	String Database	0.942
HDC	HAL	String Database	0.942
AKR1C3	PTGDS	String Database	0.942
GRIA3	GRIN2B	String Database	0.942
HSP90AB1	MAPK1	String Database	0.942
LDHA	ALDOA	String Database	0.942
AOC3	ALDH2	String Database	0.942
EARS2	YARS	String Database	0.942
PRKCA	NFKB1	String Database	0.942
NCOA1	RXRB	String Database	0.942
TOP2A	CSNK2A1	String Database	0.942
ACE2	DPP4	String Database	0.942
IARS	CARS2	String Database	0.942
TF	FGA	String Database	0.942
CRAT	AGXT	String Database	0.942
IGF2R	EGFR	String Database	0.942
BCAT1	GCLM	String Database	0.942
ESR1	ESR2	String Database	0.941
UQCRB	ATP5C1	String Database	0.941
NRG1	SRC	String Database	0.941
TAT	GOT2	String Database	0.941
CHAT	ACHE	String Database	0.941
HCK	SYK	String Database	0.941
PRKCD	ADRA2A	String Database	0.941
PRKCA	MAPK1	String Database	0.941
GAD1	GLS2	String Database	0.941
HSP90AB1	ATP5B	String Database	0.941
RXRA	MAPK1	String Database	0.941
HSPA9	OTC	String Database	0.941
PRKCA	HSP90AA1	String Database	0.941
ADRA1A	HCRT	String Database	0.941
TLR7	CTSB	String Database	0.941
PRKCA	CHUK	String Database	0.941
GRIA2	GRIN2C	String Database	0.941
G6PD	TP53	String Database	0.941
SRC	MAPK14	String Database	0.941
ACTA1	CASP3	String Database	0.941
GRM4	CNR1	String Database	0.941
CXCL10	CCL2	String Database	0.941
NPY	SSTR2	String Database	0.94
CXCR4	PIK3CG	String Database	0.94
CST3	LYZ	String Database	0.94
DRD2	GRM8	String Database	0.94
GRIA1	GRIN2D	String Database	0.94
ASS1	GOT2	String Database	0.94
DHCR24	SOAT1	String Database	0.94
MMP12	ACAN	String Database	0.94
CS	GOT2	String Database	0.94
COMT	ADH1B	String Database	0.94
IDH1	LTA4H	String Database	0.94
OAZ1	OAZ2	String Database	0.94
VCAM1	CCL2	String Database	0.94
ADRA1D	HCRT	String Database	0.94
PTH	CRH	String Database	0.94
PTGFR	PTGER1	String Database	0.94
ADSS	ADSSL1	String Database	0.94
PTGS1	MPO	String Database	0.94
A2M	EGF	String Database	0.94
ADRA1B	HCRT	String Database	0.94
ARG1	MPO	String Database	0.94
THRB	RARA	String Database	0.94
SERPINA1	CST3	String Database	0.94
VKORC1	NQO1	String Database	0.939
ADRA1A	ADRA1B	String Database	0.939
TARS	LARS	String Database	0.939
GLUD2	GLS2	String Database	0.939
PGM1	LTA4H	String Database	0.939
NCOA1	KAT5	String Database	0.939
SYK	SNCA	String Database	0.939
NFKB2	IL1A	String Database	0.939
IDH1	ALDOA	String Database	0.939
IKBKB	PRKCA	String Database	0.939
CST3	MMP9	String Database	0.939
PRKCD	NFKB1	String Database	0.939
ADRB3	ADRB2	String Database	0.939
GCLM	BCAT2	String Database	0.939
PTPN1	IGF1	String Database	0.939
ASS1	NOS2	String Database	0.939
VEGFA	PTK2B	String Database	0.939
GRIN2C	GRIA4	String Database	0.939
SRC	CAPN2	String Database	0.939
CCBL1	CTH	String Database	0.939
EDNRA	EGFR	String Database	0.939
PRKACA	NFKB1	String Database	0.939
HSP90AB1	HSPA5	String Database	0.939
RARA	MAPK1	String Database	0.939
IGF2R	EGF	String Database	0.939
C4B	C3	String Database	0.938
CD40LG	NFKB1	String Database	0.938
GLS2	CAD	String Database	0.938
PLAU	LRP1	String Database	0.938
GAD1	GLS	String Database	0.938
TP73	MAPK14	String Database	0.938
F10	F2	String Database	0.938
IKBKB	UBB	String Database	0.938
HCK	SRC	String Database	0.938
NCOA2	RARB	String Database	0.938
MMP9	LTF	String Database	0.938
ARF1	IGF2R	String Database	0.938
GRM8	HTR1A	String Database	0.938
OPRM1	CNR1	String Database	0.938
OPRK1	OPRD1	String Database	0.938
GATM	AGXT2	String Database	0.938
GRM1	CHRM1	String Database	0.938
ADRA1D	PTGER1	String Database	0.938
HCK	EGF	String Database	0.938
NPY	APP	String Database	0.938
COMT	ALDH2	String Database	0.938
CHIT1	ARG1	String Database	0.938
CD40	MAPK14	String Database	0.938
CST3	C3	String Database	0.937
SHMT1	DAO	String Database	0.937
PNP	TK1	String Database	0.937
ADRB2	EGFR	String Database	0.937
MMP9	CAMP	String Database	0.937
GAD2	GLS2	String Database	0.937
CNR1	OPRK1	String Database	0.937
GRIN2B	GRIN2A	String Database	0.937
TF	APOE	String Database	0.937
GRM7	HTR1A	String Database	0.937
CALM1	HSP90AA1	String Database	0.937
MTNR1A	MTNR1B	String Database	0.937
SNCA	CSNK2A1	String Database	0.937
GRIA4	GRIN2D	String Database	0.937
F2	IGF1	String Database	0.937
CTH	GCLC	String Database	0.937
APP	C3	String Database	0.937
GRM7	DRD4	String Database	0.937
PLA2G1B	MAPK1	String Database	0.937
ASS1	GOT1	String Database	0.937
B2M	VCAM1	String Database	0.937
GLUD2	MDH2	String Database	0.937
PRKCA	PRKCB	String Database	0.937
CNR1	SSTR2	String Database	0.937
PTGS2	CYP2B6	String Database	0.936
HK1	SI	String Database	0.936
LYZ	C3	String Database	0.936
GRIA3	GRIN2C	String Database	0.936
YARS	TARS2	String Database	0.936
CTH	CCBL2	String Database	0.936
GRIA1	PRKCB	String Database	0.936
UQCRQ	SDHC	String Database	0.936
NOS3	SPR	String Database	0.936
CS	OTC	String Database	0.936
PTGS2	CYP2C9	String Database	0.936
EARS2	PARS2	String Database	0.936
GRIN2A	GRIN2C	String Database	0.936
CHEK1	UBB	String Database	0.936
CTPS1	NME1	String Database	0.936
HDAC8	PRKACA	String Database	0.936
HSP90AB1	CALM1	String Database	0.936
PRKAA2	BECN1	String Database	0.936
YARS	PARS2	String Database	0.936
ALOX5	CYP2B6	String Database	0.935
REST	TP53	String Database	0.935
UBB	SKP1	String Database	0.935
YARS	FARS2	String Database	0.935
NFKB2	SKP1	String Database	0.935
CTH	GOT1	String Database	0.935
ACY1	ARG2	String Database	0.935
NCOR2	MAPK14	String Database	0.935
NPY	SSTR5	String Database	0.935
NAGS	GLUD1	String Database	0.935
SNCA	PLD2	String Database	0.935
TUBA1C	TUBA1A	String Database	0.935
SRR	SHMT1	String Database	0.935
TARS2	EPRS	String Database	0.935
A2M	TGFB1	String Database	0.935
GRM4	DRD3	String Database	0.934
PGM1	GCK	String Database	0.934
TARS	FARSB	String Database	0.934
BECN1	PRKAA1	String Database	0.934
CHIT1	HEXB	String Database	0.934
CPT2	CPT1A	String Database	0.934
PTGS1	HPGDS	String Database	0.934
GRIN3A	GRIN2C	String Database	0.934
HBB	LTF	String Database	0.934
HCK	GAB2	String Database	0.934
SGK1	HSP90AA1	String Database	0.934
IDH1	GLUD1	String Database	0.934
OPRM1	GRM8	String Database	0.934
GRM7	SSTR5	String Database	0.934
BECN1	ITPR1	String Database	0.934
MAOB	ALDH2	String Database	0.934
SRC	NFKB1	String Database	0.934
CDK6	SKP1	String Database	0.934
GAD2	GLS	String Database	0.934
ITPA	APRT	String Database	0.934
HGS	EGF	String Database	0.933
GLUD2	GLS	String Database	0.933
VEGFA	SERPINA1	String Database	0.933
ALDH18A1	PYCRL	String Database	0.933
CNR1	GRM7	String Database	0.933
RXRA	CPT1A	String Database	0.933
GRM8	DRD4	String Database	0.933
GMPS	PAICS	String Database	0.933
NCOA2	RXRB	String Database	0.933
CNR1	GRM8	String Database	0.933
CNR1	HTR1A	String Database	0.933
GRIA3	GRIN2D	String Database	0.933
AVPR2	PTH	String Database	0.933
ALDH18A1	POX2	String Database	0.933
HGS	M6PR	String Database	0.933
VEGFA	ACTA1	String Database	0.933
ACY1	ARG1	String Database	0.933
FGA	APOE	String Database	0.933
SCN5A	KCNH2	String Database	0.933
CAMK2A	GRIN2D	String Database	0.933
TNF	SELE	String Database	0.933
GRM4	GABBR1	String Database	0.933
CALCA	PTGIR	String Database	0.933
PRKAG1	PRKAG2	String Database	0.933
ESR1	AXIN1	String Database	0.933
GRM4	DRD4	String Database	0.933
CARS	VARS	String Database	0.933
ABAT	ALDH2	String Database	0.932
MMP9	A2M	String Database	0.932
GNMT	AGXT	String Database	0.932
PTGS1	CYP2C9	String Database	0.932
SRR	SDS	String Database	0.932
ASS1	OAT	String Database	0.932
GRM7	OPRD1	String Database	0.932
HSP90AA1	TUBA4A	String Database	0.932
IKBKB	SKP1	String Database	0.932
LEPREL2	PPIB	String Database	0.932
ESR1	TUBA1A	String Database	0.932
CYP1A2	CYP2A6	String Database	0.932
SRC	HGS	String Database	0.932
CYP2B6	ALDH1A1	String Database	0.932
GRIA2	GRIN2D	String Database	0.932
TST	GOT2	String Database	0.932
DRD1	AVPR2	String Database	0.932
B2M	APCS	String Database	0.932
OPRM1	DRD2	String Database	0.932
SELE	VCAM1	String Database	0.932
P4HB	APP	String Database	0.932
IARS2	CARS2	String Database	0.932
CXCR4	NPY	String Database	0.932
MTR	FTCD	String Database	0.931
GRIK2	GRIK1	String Database	0.931
EGLN1	EGLN3	String Database	0.931
TH	TAT	String Database	0.931
TST	GOT1	String Database	0.931
GRM4	OPRK1	String Database	0.931
CD40LG	NFKBIA	String Database	0.931
EGLN2	EGLN3	String Database	0.931
GOT1	GOT2	String Database	0.931
GRM1	AVPR1A	String Database	0.931
LCN2	LYZ	String Database	0.931
SDHC	UQCRFS1	String Database	0.931
DRD2	APP	String Database	0.931
GLS2	PPAT	String Database	0.931
NOS2	OTC	String Database	0.931
GABBR1	APP	String Database	0.931
GRIK2	GRIK3	String Database	0.931
C3	MAPK1	String Database	0.931
GRIN3A	GRIN2D	String Database	0.931
F2	MAPK1	String Database	0.931
APP	APCS	String Database	0.931
CYP1A2	CYP2C9	String Database	0.931
HTR7	PTGIR	String Database	0.931
PRKAA2	PRKAA1	String Database	0.931
CAMP	LYZ	String Database	0.931
CXCL10	C3	String Database	0.931
CHUK	SKP1	String Database	0.931
ASMT	CYP1A2	String Database	0.931
SLC25A12	CYC1	String Database	0.93
DRD2	OPRD1	String Database	0.93
FKBP1A	TGFBR2	String Database	0.93
MMP9	CHIT1	String Database	0.93
NRG1	MAPK1	String Database	0.93
TGFBR2	AXIN1	String Database	0.93
ADRA1A	ADRA1D	String Database	0.93
GRM4	OPRM1	String Database	0.93
DRD3	GRM8	String Database	0.93
LARS	SARS	String Database	0.93
GRM4	SSTR5	String Database	0.93
SYK	MAPK14	String Database	0.93
PARK2	BECN1	String Database	0.93
LDHA	GOT1	String Database	0.93
IGF2R	HGS	String Database	0.93
GOT1	TAT	String Database	0.93
ADRB1	ADRB2	String Database	0.93
GRM4	GABBR2	String Database	0.93
SERPINA1	EGF	String Database	0.93
RNASE3	C3	String Database	0.93
GRM4	SSTR2	String Database	0.93
OPRM1	PTGER3	String Database	0.93
PLA2G1B	MAPK14	String Database	0.93
DRD2	OPRK1	String Database	0.93
CYP1A2	CYP2B6	String Database	0.93
UBB	POLK	String Database	0.93
LYZ	APCS	String Database	0.93
SHMT1	AGXT2	String Database	0.93
HSPA5	HSPA9	String Database	0.929
ADRA2B	OPRD1	String Database	0.929
SDHA	ACO2	String Database	0.929
MMP9	LTA4H	String Database	0.929
OPRM1	DRD4	String Database	0.929
AXIN1	SKP1	String Database	0.929
GRM4	OPRD1	String Database	0.929
PTGER3	P2RY12	String Database	0.929
SERPINA1	P4HB	String Database	0.929
CRYZ	NQO1	String Database	0.929
SRC	SGK1	String Database	0.929
B2M	HBB	String Database	0.929
GRM8	OPRK1	String Database	0.929
TAS1R2	GABBR2	String Database	0.929
B2M	MMP9	String Database	0.929
MDH2	ACO2	String Database	0.929
DRD3	GRM7	String Database	0.929
CXCR4	CNR1	String Database	0.929
PTK2B	MAPK14	String Database	0.929
MMP9	LYZ	String Database	0.929
OPRM1	DRD3	String Database	0.929
PTK2B	VCAM1	String Database	0.929
OPRK1	GABBR2	String Database	0.929
LARS	CARS2	String Database	0.929
GAD1	GLUD2	String Database	0.929
ADRA2C	GABBR2	String Database	0.929
MAPT	MAPK1	String Database	0.929
MAT1A	TAT	String Database	0.928
HBB	LYZ	String Database	0.928
NQO1	ODC1	String Database	0.928
CCR2	APP	String Database	0.928
BACE1	LRP1	String Database	0.928
CS	GLUD1	String Database	0.928
P2RY12	ADRA2A	String Database	0.928
ADRB3	PTH	String Database	0.928
TNF	CD40	String Database	0.928
DRD3	OPRK1	String Database	0.928
MME	DPP4	String Database	0.928
CHRM2	NPY	String Database	0.928
ADRA2A	OPRK1	String Database	0.928
IGLL5	C1QA	String Database	0.928
OPRK1	DRD4	String Database	0.928
GABBR1	GRM7	String Database	0.928
CES1	MPO	String Database	0.928
ADRB2	UBB	String Database	0.928
CARS	IARS2	String Database	0.928
GRM8	APP	String Database	0.928
ADRA2B	CNR1	String Database	0.928
GRM1	HCRT	String Database	0.928
ABAT	AGXT2	String Database	0.928
AVPR2	EGFR	String Database	0.928
PTGER3	OPRD1	String Database	0.928
ADRA2B	OPRK1	String Database	0.928
ADSS	GOT2	String Database	0.928
PRKAA1	TP53	String Database	0.928
TH	SLC6A3	String Database	0.928
NCOA2	RARG	String Database	0.928
ADRB2	EGF	String Database	0.928
NOS3	OTC	String Database	0.928
ADRA2A	OPRD1	String Database	0.928
HCK	MAPK14	String Database	0.927
OPRM1	ADRA2C	String Database	0.927
PTGFR	AVPR1A	String Database	0.927
AVPR2	HGS	String Database	0.927
EGF	M6PR	String Database	0.927
OPRM1	ADRA2A	String Database	0.927
DRD3	OPRD1	String Database	0.927
SERPINA1	IGF1	String Database	0.927
TUBB	MAPK1	String Database	0.927
CNR1	APP	String Database	0.927
SLC25A13	ATP5B	String Database	0.927
CROT	AGXT	String Database	0.927
GPT	AGXT	String Database	0.927
PPIA	MAPK1	String Database	0.927
MDH2	UQCRFS1	String Database	0.927
ASPA	FOLH1	String Database	0.927
ADRA2C	OPRK1	String Database	0.927
GAD2	GLUD2	String Database	0.927
OPRD1	DRD4	String Database	0.927
CD40LG	MAPK14	String Database	0.927
GRM8	OPRD1	String Database	0.927
PRKCB	MAPK1	String Database	0.927
SLC25A12	ATP5A1	String Database	0.927
DRD3	GABBR2	String Database	0.927
YARS	AARS2	String Database	0.927
ADRA2B	OPRM1	String Database	0.927
PRKCD	NFKBIA	String Database	0.927
HTR1A	OPRK1	String Database	0.927
GABBR1	GRM8	String Database	0.927
SLC25A13	ATP5A1	String Database	0.927
LARS2	PARS2	String Database	0.927
NAGK	HEXB	String Database	0.927
PARK2	SKP1	String Database	0.927
GABBR2	OPRD1	String Database	0.927
ADRA2C	OPRD1	String Database	0.927
B2M	APP	String Database	0.926
GATM	AGXT	String Database	0.926
NPY	TAS1R2	String Database	0.926
GATM	GNMT	String Database	0.926
IDH1	HAO1	String Database	0.926
IKBKG	SKP1	String Database	0.926
SYK	FAS	String Database	0.926
GRM1	TACR1	String Database	0.926
SYK	FGA	String Database	0.926
LARS	YARS2	String Database	0.926
HCRT	APP	String Database	0.926
ITPR1	PRKCB	String Database	0.926
CALR	APOE	String Database	0.926
GAD1	GLUD1	String Database	0.926
MTR	BHMT2	String Database	0.926
GATM	SHMT1	String Database	0.926
VLDLR	PLAU	String Database	0.926
EDNRA	EGF	String Database	0.926
FGA	LGALS1	String Database	0.926
TNF	PTGS2	String Database	0.926
BACE1	NCSTN	String Database	0.926
APP	OPRD1	String Database	0.926
VEGFA	A2M	String Database	0.926
OPRM1	HTR1A	String Database	0.926
NCOA2	SIRT1	String Database	0.926
ITPA	NME1	String Database	0.926
OPRM1	GRM7	String Database	0.926
SYK	ITPR1	String Database	0.926
HCK	F2	String Database	0.926
CROT	CRAT	String Database	0.926
CHRM2	CNR1	String Database	0.926
HCK	PTK2B	String Database	0.926
ALOX5	CYP2C9	String Database	0.926
SYK	NFKB1	String Database	0.926
IGF2R	LRP2	String Database	0.926
CTH	BHMT2	String Database	0.926
TH	AKR1B1	String Database	0.925
GRM7	GABBR2	String Database	0.925
GRM1	ADRA1B	String Database	0.925
GJA1	MAPK1	String Database	0.925
TP53	PRKAB2	String Database	0.925
GLUD2	NAGS	String Database	0.925
B2M	LTF	String Database	0.925
MDH2	TPI1	String Database	0.925
CYP2B6	HPGDS	String Database	0.925
ATP5A1	CS	String Database	0.925
ADRA2B	GRM4	String Database	0.925
SERPINA1	APP	String Database	0.925
CFD	IGF1	String Database	0.925
DRD3	APP	String Database	0.925
CCR2	C3	String Database	0.925
PTK2B	HSP90AA1	String Database	0.925
DHFR	TH	String Database	0.925
GABBR2	DRD4	String Database	0.925
TACR1	HCRT	String Database	0.925
ADRB1	PTH	String Database	0.925
VKORC1	CYP2C9	String Database	0.925
TLR4	IL1B	String Database	0.925
TARS2	AARS	String Database	0.925
PTGER3	ADRA2A	String Database	0.925
SKP1	NFKB1	String Database	0.925
GOT2	MIF	String Database	0.925
HTR1A	APP	String Database	0.925
BBOX1	ALDH2	String Database	0.925
SLC25A12	CS	String Database	0.925
LARS2	SARS	String Database	0.925
BECN1	CASP3	String Database	0.925
EPRS	YARS2	String Database	0.925
ADRA1A	PTGER1	String Database	0.925
MDH2	SDHA	String Database	0.925
ADRA1D	GRM1	String Database	0.925
HRH2	PTH	String Database	0.925
MGAM	PYGM	String Database	0.925
P4HB	ADAM10	String Database	0.925
KAT5	UBB	String Database	0.925
PTGS1	CYP2B6	String Database	0.925
VARS	YARS	String Database	0.924
AKR1C3	HPGDS	String Database	0.924
HSP90AA1	PRKACA	String Database	0.924
ADRA2B	PTGER3	String Database	0.924
GATM	NOS3	String Database	0.924
DARS	AARS2	String Database	0.924
ADSSL1	GOT2	String Database	0.924
ADRA2C	P2RY12	String Database	0.924
UQCRB	SDHA	String Database	0.924
GOT1	ADSS	String Database	0.924
EDNRA	AVPR1A	String Database	0.924
CYP2D6	PPIG	String Database	0.924
CXCR4	F2	String Database	0.924
ADRA1B	PTGER1	String Database	0.924
AVPR2	PTGIR	String Database	0.924
GANC	SI	String Database	0.924
SDHD	UQCRFS1	String Database	0.924
PHOSPHO1	PCYT1A	String Database	0.924
PLD1	ADAM10	String Database	0.924
GOT1	ADSSL1	String Database	0.924
B2M	NFKB1	String Database	0.924
PAH	GOT1	String Database	0.924
SRR	AGXT	String Database	0.924
HTR1A	OPRD1	String Database	0.924
REST	PPARG	String Database	0.924
GRM4	ADRA2A	String Database	0.924
TH	GOT1	String Database	0.924
CNR1	P2RY12	String Database	0.924
LCN2	CTSD	String Database	0.923
B2M	HSPA5	String Database	0.923
VEGFA	CFD	String Database	0.923
TARS	AARS	String Database	0.923
ADRA1A	GRM1	String Database	0.923
GABBR1	SSTR5	String Database	0.923
CHRM2	GABBR1	String Database	0.923
NPY	MTNR1A	String Database	0.923
BDNF	ADAM17	String Database	0.923
CXCR4	DRD2	String Database	0.923
LARS2	AARS	String Database	0.923
CD40	PIK3CG	String Database	0.923
DRD2	SSTR2	String Database	0.923
LCN2	ARG1	String Database	0.923
AVPR2	EGF	String Database	0.923
GRM1	APP	String Database	0.923
DRD3	PTGER3	String Database	0.923
ADRA2A	GABBR2	String Database	0.923
GRM7	OPRK1	String Database	0.923
GSK3B	UBB	String Database	0.923
NPY	GRM7	String Database	0.923
ALDH2	AGXT2	String Database	0.923
PRKCA	ADRA2C	String Database	0.923
GPT2	AGXT	String Database	0.923
OPRM1	GABBR2	String Database	0.923
P4HB	APOE	String Database	0.923
HRH2	CALCA	String Database	0.923
NPY	MTNR1B	String Database	0.923
RXRA	FABP6	String Database	0.923
LARS2	EPRS	String Database	0.923
PRKCB	EGF	String Database	0.923
CHRM2	GABBR2	String Database	0.923
GRM8	GABBR2	String Database	0.923
HAO1	CRAT	String Database	0.923
LDHB	GOT2	String Database	0.923
CNR1	PTGER3	String Database	0.923
LDHA	G6PD	String Database	0.922
HLA-A	VCAM1	String Database	0.922
IKBKG	PRKCB	String Database	0.922
CYP2B6	PPIG	String Database	0.922
VEGFA	ALDOA	String Database	0.922
CHIT1	CTSD	String Database	0.922
TFF2	EGFR	String Database	0.922
PRKCB	GRIA4	String Database	0.922
TAS1R2	SSTR5	String Database	0.922
GSK3B	CDK6	String Database	0.922
TH	MAPK14	String Database	0.922
BDNF	MMP7	String Database	0.922
CARS	AARS	String Database	0.922
GOT1	CDO1	String Database	0.922
CAMK2A	GRM1	String Database	0.922
A2M	F13A1	String Database	0.922
HSP90AA1	IFNG	String Database	0.922
CYP2D6	CYP2A6	String Database	0.922
GRM4	NPY	String Database	0.922
SERPINA1	CFD	String Database	0.922
CHRM2	IGF2R	String Database	0.922
GRM7	ADRA2A	String Database	0.922
PPARA	NOS2	String Database	0.922
GRM4	GRM1	String Database	0.922
RNASE3	LYZ	String Database	0.922
CHRM2	OPRK1	String Database	0.922
MMP9	CTRB1	String Database	0.922
CFD	APP	String Database	0.921
EGFR	M6PR	String Database	0.921
PTGER3	DRD4	String Database	0.921
HSP90AB1	ESR2	String Database	0.921
CXCR4	CCR2	String Database	0.921
NCOA2	RXRG	String Database	0.921
CXCR4	C3	String Database	0.921
B2M	CTSD	String Database	0.921
HTR7	ADRB2	String Database	0.921
NDUFC2	UQCRC1	String Database	0.921
SLC25A12	ATP5B	String Database	0.921
ADRA2B	P2RY12	String Database	0.921
COL25A1	PLOD1	String Database	0.921
PRKCA	ITPR1	String Database	0.921
YARS2	SARS	String Database	0.921
CNR1	CCR2	String Database	0.921
ADSS	ASNS	String Database	0.921
CXCL10	APP	String Database	0.921
HGS	ADRB2	String Database	0.921
CSNK2A1	SIRT1	String Database	0.921
PRKAA2	TP53	String Database	0.921
SRC	FGA	String Database	0.921
CXCR4	PTGER3	String Database	0.921
APP	DRD4	String Database	0.921
ADRA1A	EDNRA	String Database	0.921
GSK3B	PRKACA	String Database	0.921
CHRM2	CXCR4	String Database	0.921
HSP90AA1	MMP2	String Database	0.921
ADRB1	HTR7	String Database	0.921
NFKB2	UBB	String Database	0.921
PTGFR	AVPR1B	String Database	0.921
GRM4	ADRA2C	String Database	0.921
TACR1	CHRM3	String Database	0.921
CXCR4	GABBR1	String Database	0.921
AXIN1	PIN1	String Database	0.921
RPL23	RSL24D1	String Database	0.921
MGAM	PYGL	String Database	0.921
IKBKG	FAS	String Database	0.921
AMY1A	GANC	String Database	0.92
TAS1R2	OPRD1	String Database	0.92
SLC25A13	CYC1	String Database	0.92
PRKCA	ADRA2A	String Database	0.92
EGFR	LRP2	String Database	0.92
CHUK	IL1A	String Database	0.92
OPRM1	TAS1R2	String Database	0.92
CYP1A2	ALDH1A1	String Database	0.92
PLAU	ADAM10	String Database	0.92
HTR7	DRD5	String Database	0.92
C3	GRN	String Database	0.92
LCT	GCK	String Database	0.92
CD40LG	PIK3CG	String Database	0.92
ADRA1D	EDNRA	String Database	0.92
EDNRA	APP	String Database	0.92
PLA2G6	PLA2G1B	String Database	0.92
DRD2	HTR1A	String Database	0.92
TLR4	NFKB1	String Database	0.92
APRT	ADA	String Database	0.92
ADRA2B	PRKCA	String Database	0.92
APBB1	ESR1	String Database	0.92
PAH	AKR1B1	String Database	0.92
ALDOA	HBB	String Database	0.92
CXCR4	APP	String Database	0.92
ADRA1D	AVPR1B	String Database	0.92
GRM1	CHRM3	String Database	0.92
IDH1	NOS2	String Database	0.92
GABBR1	SSTR2	String Database	0.92
ADRA2A	MTNR1B	String Database	0.92
ADRA1B	APP	String Database	0.92
LTF	LTA4H	String Database	0.92
MGAM	PLD1	String Database	0.92
SERPINA1	F13A1	String Database	0.92
CYP2A6	ALDH1A1	String Database	0.92
IARS2	YARS2	String Database	0.92
LDHA	GOT2	String Database	0.92
MAPK1	GRN	String Database	0.919
IGF1	F13A1	String Database	0.919
NQO1	GGCX	String Database	0.919
HTR1A	ADRA2A	String Database	0.919
EDNRA	ADRA1B	String Database	0.919
B2M	SYK	String Database	0.919
VEGFA	TNF	String Database	0.919
DRD1	CALCA	String Database	0.919
GRIA3	PRKCA	String Database	0.919
PRKCB	NFKBIA	String Database	0.919
TAT	BHMT	String Database	0.919
GPT2	NAGS	String Database	0.919
DRD1	HTR7	String Database	0.919
CHRM2	ADRB2	String Database	0.919
HIF1A	P4HB	String Database	0.919
TGFBR2	UBB	String Database	0.919
CHRM2	P2RY12	String Database	0.919
GRM7	APP	String Database	0.919
TAS1R2	CNR1	String Database	0.919
ADRA2C	DRD2	String Database	0.919
MTR	TAT	String Database	0.919
UBB	ADAM10	String Database	0.919
MPO	GRN	String Database	0.919
IKBKB	FAS	String Database	0.919
SSTR2	APP	String Database	0.919
AXIN1	TGFB1	String Database	0.919
TF	CST3	String Database	0.919
HK1	LCT	String Database	0.919
SSTR5	APP	String Database	0.919
ADRB2	PTGIR	String Database	0.919
PGM1	HBB	String Database	0.919
LEPREL1	COL1A1	String Database	0.919
HCK	PRKCD	String Database	0.919
GPT	NAGS	String Database	0.919
CHRM2	DRD2	String Database	0.919
ARG1	LYZ	String Database	0.919
LCN2	MMP9	String Database	0.919
IDH2	MDH2	String Database	0.919
DRD2	PTGER3	String Database	0.919
CNR1	GABBR2	String Database	0.919
CRAT	CPT1A	String Database	0.919
PTGER3	OPRK1	String Database	0.919
FGA	TGFB1	String Database	0.918
CHRM2	OPRM1	String Database	0.918
RXRA	TNF	String Database	0.918
SRC	CHRM1	String Database	0.918
PTGER1	APP	String Database	0.918
NRG1	HSP90AA1	String Database	0.918
TAS1R2	OPRK1	String Database	0.918
IDH1	HBB	String Database	0.918
FGA	MAPK1	String Database	0.918
PTGER3	APP	String Database	0.918
IDH1	AGXT	String Database	0.918
ADRA2C	PTGER3	String Database	0.918
CHUK	FAS	String Database	0.918
CHRM2	OPRD1	String Database	0.918
ADRA1D	CHRM3	String Database	0.918
CST3	LTF	String Database	0.918
ADA	DPP4	String Database	0.918
ACO2	OTC	String Database	0.918
CTH	AGXT2	String Database	0.918
ADRA1D	PTGFR	String Database	0.918
CXCR4	DRD4	String Database	0.918
PRKCD	IGF1	String Database	0.918
MGAM	GANC	String Database	0.918
TF	P4HB	String Database	0.918
VEGFA	PTGS2	String Database	0.918
ARG1	MAPK1	String Database	0.918
GAD2	CDO1	String Database	0.918
TLR2	NFKB1	String Database	0.918
AMY2B	GANC	String Database	0.918
VEGFA	TP53	String Database	0.918
AVPR1A	HCRT	String Database	0.918
CHD1	ESR1	String Database	0.918
SERPINA1	ALDOA	String Database	0.917
ADRA2B	HTR1A	String Database	0.917
UBB	NFKBIA	String Database	0.917
PLOD3	PLOD1	String Database	0.917
CSNK2A1	NFKBIA	String Database	0.917
LYZ	CTSD	String Database	0.917
GAD2	GLUD1	String Database	0.917
GGA3	UBB	String Database	0.917
AVPR2	CRH	String Database	0.917
SLC25A13	CS	String Database	0.917
TAS1R2	DRD2	String Database	0.917
NOS2	UBB	String Database	0.917
CALCA	APP	String Database	0.917
B2M	CAMP	String Database	0.917
CALCA	DRD5	String Database	0.917
ADAM10	C3	String Database	0.917
APP	NFKB1	String Database	0.917
ADRA1B	AVPR1A	String Database	0.917
GLS	PPAT	String Database	0.917
PAH	GOT2	String Database	0.917
TP53	PRKAB1	String Database	0.917
DRD1	PTH	String Database	0.917
ARG1	CAMP	String Database	0.917
ADRB3	HTR7	String Database	0.917
PIN1	MAPK1	String Database	0.917
ADRB3	PTGIR	String Database	0.917
NOS3	SIRT1	String Database	0.917
PAH	TYR	String Database	0.917
NOS2	AGXT	String Database	0.917
SSTR2	DRD4	String Database	0.917
CST3	APCS	String Database	0.917
EGF	LRP2	String Database	0.916
HIF1A	MAPK1	String Database	0.916
DRD3	SSTR2	String Database	0.916
ADRB1	PTGIR	String Database	0.916
KARS	FARSB	String Database	0.916
PRKCB	PLD2	String Database	0.916
HTR1A	SSTR5	String Database	0.916
CXCR4	ADRB2	String Database	0.916
LGSN	GLUL	String Database	0.916
IFNB1	PTPN1	String Database	0.916
LYZ	NFKB1	String Database	0.916
CFD	FGA	String Database	0.916
NPY	GABBR2	String Database	0.916
UBB	NFKB1	String Database	0.916
ALDOA	IGF1	String Database	0.916
ADRA1B	CHRM1	String Database	0.916
B2M	IDH1	String Database	0.916
DRD3	SSTR5	String Database	0.916
ADRA2B	DRD2	String Database	0.916
MTNR1B	DRD4	String Database	0.916
MMP9	PRSS1	String Database	0.916
CXCR4	GRM8	String Database	0.916
OPRM1	APP	String Database	0.916
ADSSL1	ASNS	String Database	0.916
CXCR4	DRD3	String Database	0.916
CNR1	SSTR5	String Database	0.916
ALDOA	CTSD	String Database	0.916
ARG1	RNASE3	String Database	0.916
GRIA3	PRKCB	String Database	0.916
ADRA1D	CHRM1	String Database	0.916
PGM1	CTSD	String Database	0.916
ALDOA	FGA	String Database	0.916
GRM7	SSTR2	String Database	0.916
TAS1R2	SSTR2	String Database	0.916
HNF1A	MAPK1	String Database	0.916
SERPINB3	GRN	String Database	0.916
TH	GOT2	String Database	0.916
ADRB1	DRD5	String Database	0.916
SSTR5	DRD4	String Database	0.916
NFKB1	SIRT1	String Database	0.915
RNASE3	MAPK1	String Database	0.915
DRD3	MTNR1B	String Database	0.915
CHRM2	DRD3	String Database	0.915
SSTR2	OPRD1	String Database	0.915
AVPR2	ADRB2	String Database	0.915
ADRA1A	CHRM3	String Database	0.915
TACR1	EGFR	String Database	0.915
AKR1C3	SPR	String Database	0.915
SRC	PRKCB	String Database	0.915
ADRA2C	SSTR5	String Database	0.915
PDK2	PRKCB	String Database	0.915
FGA	APP	String Database	0.915
CXCR4	HGS	String Database	0.915
GRM1	GRM8	String Database	0.915
RXRA	NFKBIA	String Database	0.915
SSTR5	C3	String Database	0.915
CAMP	CTSD	String Database	0.915
BCAT1	GCLC	String Database	0.915
UBB	TGFB1	String Database	0.915
P2RY12	CCR2	String Database	0.915
DRD3	P2RY12	String Database	0.915
NFKB2	APP	String Database	0.915
GRM8	ADRA2A	String Database	0.915
CHEK2	MAPK1	String Database	0.915
FGA	EGF	String Database	0.915
PGAM2	TPI1	String Database	0.915
PTGS2	TP53	String Database	0.915
ADRA2B	DRD3	String Database	0.915
GRIN1	GRIN3B	String Database	0.915
PPARA	UGT1A9	String Database	0.915
PRKCD	SERPINB3	String Database	0.915
SNCA	APCS	String Database	0.915
MTNR1A	DRD4	String Database	0.915
APP	GABBR2	String Database	0.915
UBB	TACR1	String Database	0.915
PTGER3	CXCL10	String Database	0.915
IDH1	GOT1	String Database	0.915
IDH1	CRAT	String Database	0.915
APOE	LGALS1	String Database	0.915
APP	LYZ	String Database	0.915
OAZ2	OAZ3	String Database	0.915
OPRM1	C3	String Database	0.915
BECN1	PRKAG1	String Database	0.915
CYC1	NDUFC2	String Database	0.915
LCN2	NFKB1	String Database	0.915
PTGIR	PTH	String Database	0.915
AVPR2	CALCA	String Database	0.915
PTK2B	GSK3B	String Database	0.915
B2M	ARG1	String Database	0.915
HSPA5	PPIB	String Database	0.915
DRD2	ADRA2A	String Database	0.915
ARG1	C3	String Database	0.915
G6PD	GAPDHS	String Database	0.915
TNF	UBB	String Database	0.915
CFD	EGF	String Database	0.915
HEXB	LYZ	String Database	0.915
RENBP	HEXB	String Database	0.915
LYZ	MAPK1	String Database	0.915
CXCR4	PTGER1	String Database	0.915
ADRA1B	TACR1	String Database	0.915
DRD3	MTNR1A	String Database	0.915
P2RY12	APP	String Database	0.915
NAGK	CHIT1	String Database	0.915
ESR2	MAPK1	String Database	0.915
PDK2	PRKCA	String Database	0.915
GART	ADSS	String Database	0.915
ADRA2B	PRKCD	String Database	0.915
ADRA2C	DRD3	String Database	0.915
TH	SLC18A2	String Database	0.915
PRKCD	IFNG	String Database	0.915
PTK2B	PRKCB	String Database	0.914
WARS	SARS	String Database	0.914
DRD3	ADRA2A	String Database	0.914
ADRA2B	GABBR2	String Database	0.914
HTR1A	DRD4	String Database	0.914
ADRB3	DRD5	String Database	0.914
COL25A1	COL1A1	String Database	0.914
DRD2	MTNR1B	String Database	0.914
ARG1	LTF	String Database	0.914
CHRM1	TACR1	String Database	0.914
PTGFR	EDNRA	String Database	0.914
DRD3	HTR1A	String Database	0.914
DRD2	P2RY12	String Database	0.914
DRD3	TAS1R2	String Database	0.914
ADRA2B	DRD4	String Database	0.914
CHIT1	CAMP	String Database	0.914
ADRA1B	CHRM3	String Database	0.914
CHRM2	PTGER3	String Database	0.914
DRD1	ADRB3	String Database	0.914
TAT	TYR	String Database	0.914
EGF	F13A1	String Database	0.914
TF	EGF	String Database	0.914
ADRA1A	TACR1	String Database	0.914
GATM	NOS2	String Database	0.914
SDHA	GOT2	String Database	0.914
CST3	CHIT1	String Database	0.914
ADRA2C	GRM7	String Database	0.914
ADRA1D	TACR1	String Database	0.914
GRM1	GRM7	String Database	0.914
VEGFA	CCL2	String Database	0.914
ADRB2	TACR1	String Database	0.914
HBB	CTSD	String Database	0.914
ADRA2C	HTR1A	String Database	0.914
PLD3	PLD2	String Database	0.914
ADRA1A	PTGFR	String Database	0.914
MMP12	A2M	String Database	0.914
GAD1	CDO1	String Database	0.914
ADRA2C	DRD4	String Database	0.914
CHRM1	APP	String Database	0.914
PLD1	PRKCB	String Database	0.914
DRD5	ADRB2	String Database	0.913
CHRM2	TACR1	String Database	0.913
HTR1A	MTNR1A	String Database	0.913
HTR7	SLC6A4	String Database	0.913
GSK3B	PIN1	String Database	0.913
CST3	HBB	String Database	0.913
DRD1	PTGIR	String Database	0.913
TARS	KARS	String Database	0.913
ATP5C1	CYC1	String Database	0.913
APCS	LTF	String Database	0.913
HEXB	GRN	String Database	0.913
CDO1	GOT2	String Database	0.913
COMT	SLC6A4	String Database	0.913
HTR1A	P2RY12	String Database	0.913
P4HB	C3	String Database	0.913
SSTR2	GABBR2	String Database	0.913
OPRM1	CXCR4	String Database	0.913
NPY	C3	String Database	0.913
SSTR5	ADRA2A	String Database	0.913
FGA	IGF1	String Database	0.913
OLR1	ADAM10	String Database	0.913
AKR1C3	CYP1A2	String Database	0.913
DRD1	ADRB1	String Database	0.913
CROT	DAO	String Database	0.913
SSTR2	ADRA2A	String Database	0.913
B2M	ALDOA	String Database	0.913
LYZ	LTA4H	String Database	0.913
MMP9	IL1B	String Database	0.913
CFD	A2M	String Database	0.913
APP	ADRA2A	String Database	0.913
HTR7	PTH	String Database	0.913
CHRM1	ADRB2	String Database	0.913
ADRA2C	SSTR2	String Database	0.913
GABBR1	MTNR1A	String Database	0.913
ADRA2B	SSTR5	String Database	0.913
ESR1	ALDOA	String Database	0.913
ADRB1	AVPR2	String Database	0.913
MGAM	LILRB2	String Database	0.913
CST3	FGA	String Database	0.913
F10	F13A1	String Database	0.913
CYP2A6	CYP2C9	String Database	0.913
DRD2	MTNR1A	String Database	0.913
ADRA2A	DRD4	String Database	0.913
GRIN2B	GRIN2C	String Database	0.913
GART	RPL3	String Database	0.912
TAT	BHMT2	String Database	0.912
ADRA1A	CHRM1	String Database	0.912
APP	LTF	String Database	0.912
ADRA1A	AVPR1A	String Database	0.912
CST3	ADAM10	String Database	0.912
IARS	TARS2	String Database	0.912
TAS1R2	DRD4	String Database	0.912
ALDOA	G6PD	String Database	0.912
CXCR4	OPRK1	String Database	0.912
ADRA1D	ADRA1B	String Database	0.912
BECN1	PRKAB1	String Database	0.912
CYP2B6	CYP2C9	String Database	0.912
CHRM2	ADRA2A	String Database	0.912
SSTR5	GABBR2	String Database	0.912
CS	GLUD2	String Database	0.912
ADRA2B	SSTR2	String Database	0.912
LCN2	CHIT1	String Database	0.912
ADRA2B	APP	String Database	0.912
SSTR2	GRM8	String Database	0.912
P2RY12	CXCL10	String Database	0.912
DBH	AOC3	String Database	0.912
IARS2	WARS2	String Database	0.912
F13A1	TGFB1	String Database	0.912
AVPR1B	HCRT	String Database	0.912
UBB	AGXT	String Database	0.912
AKR1B1	LCT	String Database	0.912
ADRA2C	APP	String Database	0.912
NPY	PTGER3	String Database	0.912
AVPR1B	ADRA1B	String Database	0.912
GRM4	APP	String Database	0.912
ADRA2C	GRM8	String Database	0.912
PTGER3	CCR2	String Database	0.912
A2M	LRP1	String Database	0.912
ADRA2B	CHRM2	String Database	0.912
[truncated: 8,817 more rows]
