# Supplementary material for: Integrated phytochemical analysis based on UHPLC-LTQ–Orbitrap and network pharmacology approaches to explore the potential mechanism of Lycium ruthenicum Murr. for ameliorating Alzheimer's disease
Source: Royal Society of Chemistry journal article supplement (doi:10.1039/c9fo02840d), 2020-01-01
Supplement: c9fo02840d5.xlsx [file c9fo02840d5.xlsx]

## Sheet: Sheet1
Title: Integrated phytochemical analysis based on UHPLC-LTQ-Orbitrap and network pharmacology approach to explore the potential mechanism of Lycium ruthenicum Murr. for alleviating Alzheimer's disease Authors: Yuanyuan Shi et al.
Table S4 Information about major hubs
Major hubs	Degree	BetweennessCentrality	ClosenessCentrality
APP	71	0.0311381	0.657407		Notes: major hubs colored with black are putative targets of LRM; major hubs colored with red are known therapeutic targets of AD; major hubs colored with blue are the overlap of putative targets of LRM and known therapeutic targets of AD
TNF	69	0.0164157	0.657407
TP53	67	0.0252627	0.654378
BDNF	66	0.024669	0.642534
CASP3	65	0.0134562	0.645455
IL1B	65	0.0180401	0.642534
MAPK1	64	0.0163931	0.645455
VEGFA	62	0.0136232	0.63964
EGF	58	0.0122497	0.622807
EGFR	58	0.0144658	0.625551
SRC	58	0.0117543	0.612069
PTGS2	57	0.010485	0.622807
GPT	56	0.0304443	0.622807
HSP90AA1	56	0.0263133	0.622807
NOS3	54	0.0160518	0.614719
CXCR4	53	0.0119805	0.584362
MMP9	52	0.00496756	0.606838
TLR4	52	0.00692397	0.612069
GSR	50	0.025277	0.604255
IGF1	50	0.00608273	0.599156
APOE	49	0.00850009	0.596639
CXCL10	49	0.0120737	0.581967
CCL2	47	0.00244087	0.579592
CNR1	47	0.00914158	0.568
ESR1	47	0.0100097	0.596639
TH	47	0.0152622	0.591667
HMOX1	44	0.00386347	0.586777
PPARG	44	0.00515951	0.584362
SIRT1	43	0.00900101	0.586777
GRIN2B	42	0.0107776	0.584362
MAPK14	42	0.0023295	0.563492
C3	41	0.0109274	0.565737
DRD2	41	0.00370256	0.533835
NOS2	41	0.00673994	0.581967
NPY	41	0.00480346	0.541985
OPRM1	41	0.0041164	0.533835
TLR2	41	0.00212529	0.577236
TPI1	41	0.010437	0.525926
CCR2	40	0.00598652	0.533835
ACE	39	0.00463246	0.556863
GAPDHS	39	0.0128211	0.563492
GLUL	38	0.0143457	0.574899
REN	38	0.00541997	0.554688
GOT2	37	0.0105997	0.563492
IFNG	37	0.000886	0.563492
MMP2	37	0.000963	0.546154
MPO	37	0.00371684	0.570281
NFKB1	37	0.00253463	0.554688
TGFB1	37	0.00132994	0.563492
VCAM1	37	0.000834	0.533835
ACHE	36	0.00717765	0.556863
CS	36	0.00607208	0.539924
GABBR1	36	0.00263072	0.523985
GRIA1	36	0.00733331	0.563492
HIF1A	36	0.00396666	0.561265
HTR1A	36	0.00370006	0.529851
DRD4	35	0.00179397	0.516364
F2	35	0.00677885	0.568
ADRA2C	34	0.00191661	0.516364
DRD3	34	0.00155896	0.514493
GRIN1	34	0.00767597	0.561265
IDH1	34	0.00622027	0.531835
LDHA	34	0.00448254	0.529851
SHMT1	34	0.00732426	0.501767
ADRA2A	33	0.00166468	0.508961
G6PD	33	0.00560408	0.552529
GRIN2A	33	0.00571193	0.554688
HPGDS	33	0.0039291	0.563492
HSPA5	33	0.00779651	0.563492
TLR9	33	0.000783	0.550388
ADRA2B	32	0.00161837	0.507143
GRM4	32	0.00364508	0.514493
GRM7	32	0.00147006	0.501767
ALDH18A1	31	0.00499522	0.512635
ARG1	31	0.00632798	0.556863
CRH	31	0.00225175	0.518248
GAD1	31	0.0138108	0.537879
GLUD1	31	0.00548017	0.514493
OPRD1	31	0.000983	0.496503
GSK3B	30	0.00272129	0.559055
HK1	30	0.00395299	0.527881
OPRK1	30	0.00330259	0.503546
TLR7	30	0.000541	0.529851
ALDOA	29	0.00549252	0.552529
COMT	29	0.00319441	0.512635
EPRS	29	0.0114789	0.546154
GOT1	29	0.00592521	0.533835
GPI	29	0.0017423	0.482993
GRM8	29	0.000778	0.493056
HSPA9	29	0.00683098	0.529851
MAPT	29	0.00280614	0.539924
NFKBIA	29	0.00139607	0.525926
SDHA	29	0.00222877	0.496503
SDHC	29	0.00450781	0.527881
SLC6A4	29	0.00167422	0.516364
ATP5A1	28	0.00304941	0.496503
GAD2	28	0.00909209	0.548263
GRM1	28	0.00260853	0.518248
PRKCA	28	0.00466867	0.522059
ASS1	27	0.00481909	0.533835
B2M	27	0.00231118	0.537879
CHRM2	27	0.00181722	0.494774
HSP90AB1	27	0.00468556	0.529851
P4HB	27	0.00720675	0.550388
ADRB2	26	0.00223429	0.512635
CD40	26	0.000218	0.510791
GRIA2	26	0.00270971	0.531835
LDHB	26	0.00225658	0.482993
CALCA	25	0.00126401	0.501767
CALM1	25	0.00310513	0.533835
SNCA	25	0.00309971	0.522059
UBB	25	0.00645163	0.544061
ATP5B	24	0.00203771	0.484642
CTSD	24	0.00259951	0.529851
DRD1	24	0.00133427	0.478114
IDH2	24	0.000962	0.498246
MDH2	24	0.000693	0.478114
PPIG	24	0.00499501	0.539924
SERPINA1	24	0.00240812	0.541985
SLC1A2	24	0.00429303	0.539924
CTSB	23	0.000548	0.514493
GART	23	0.00316101	0.493056
KARS	23	0.00740428	0.527881
NQO1	23	0.00251808	0.541985
MGAM	21	0.00313332	0.533835
PPARA	21	0.00147862	0.529851
PRKACA	21	0.00151544	0.508961
PSEN1	21	0.00268818	0.533835
YARS	21	0.00274922	0.464052
EARS2	20	0.00748457	0.527881
SDHB	20	0.000394	0.486301
APRT	19	0.00419994	0.5
DHFR	19	0.00419044	0.535849
RPL8	19	0.00277995	0.458065
VARS	19	0.00137511	0.473333
CTH	18	0.00251732	0.493056
OAT	18	0.00116977	0.471761
PLD1	18	0.0031288	0.533835
ASNS	17	0.00172794	0.462541
GMPS	17	0.00168529	0.47973
PAICS	13	0.000737	0.458065
AGXT	12	0.00237368	0.5
CARS	11	0.000117	0.409222
