# Supplementary material for: Integrated phytochemical analysis based on UHPLC-LTQ–Orbitrap and network pharmacology approaches to explore the potential mechanism of Lycium ruthenicum Murr. for ameliorating Alzheimer's disease
Source: Royal Society of Chemistry journal article supplement (doi:10.1039/c9fo02840d), 2020-01-01
Supplement: c9fo02840d6.xlsx [file c9fo02840d6.xlsx]

## Sheet: Sheet1
Title: Integrated phytochemical analysis based on UHPLC-LTQ-Orbitrap and network pharmacology approach to explore the potential mechanism of Lycium ruthenicum Murr. for alleviating Alzheimer's disease Authors: Yuanyuan Shi et al.
Table S5 Major putative hubs of LRM involved in Alzheimer’s disease pathway
Pathway	Major LRM hubs	Chem ID	Chem name
Alzheimer’s disease	TNF	P1	L-Aspartic acid, 4-β-D-glucopyranosyl ester
Alzheimer’s disease	TNF	P16	Melilotoside
Alzheimer’s disease	TNF	P2	(1ξ)-1-C-Amino-L-iditol
Alzheimer’s disease	TNF	P20	Ferulic acid 4-O-glucoside
Alzheimer’s disease	TNF	P28	Prunin
Alzheimer’s disease	TNF	P29	Naringenin 4'-O-glucoside
Alzheimer’s disease	TNF	P7	Protocatechuic acid 3-glucoside
Alzheimer’s disease	TNF	P9	Caffeic acid 3-O-glucoside
Alzheimer’s disease	SDHC	P10	Chlorogenic acid glucoside
Alzheimer’s disease	SDHC	P16	Melilotoside
Alzheimer’s disease	SDHC	P18	Cryptochlorogenic acid glucoside
Alzheimer’s disease	SDHC	P20	Ferulic acid 4-O-glucoside
Alzheimer’s disease	SDHC	P28	Prunin
Alzheimer’s disease	SDHC	P29	Naringenin 4'-O-glucoside
Alzheimer’s disease	SDHC	P31	rutin
Alzheimer’s disease	SDHC	P33	Kaempferol-3-O-rutinoside
Alzheimer’s disease	SDHC	P7	Protocatechuic acid 3-O-glucoside
Alzheimer’s disease	SDHC	P8	Neochlorogenic acid glucoside
Alzheimer’s disease	SDHC	P9	Caffeic acid 3-O-glucoside
Alzheimer’s disease	SDHB	P10	Chlorogenic acid glucoside
Alzheimer’s disease	SDHB	P16	Melilotoside
Alzheimer’s disease	SDHB	P18	Cryptochlorogenic acid glucoside
Alzheimer’s disease	SDHB	P20	Ferulic acid 4-O-glucoside
Alzheimer’s disease	SDHB	P28	Prunin
Alzheimer’s disease	SDHB	P29	Naringenin 4'-O-glucoside
Alzheimer’s disease	SDHB	P31	Rutin
Alzheimer’s disease	SDHB	P33	Kaempferol-3-O-rutinoside
Alzheimer’s disease	SDHB	P7	Protocatechuic acid 3-O-glucoside
Alzheimer’s disease	SDHB	P8	Neochlorogenic acid glucoside
Alzheimer’s disease	SDHB	P9	Caffeic acid 3-O-glucoside
Alzheimer’s disease	SDHA	P10	Chlorogenic acid glucoside
Alzheimer’s disease	SDHA	P16	Melilotoside
Alzheimer’s disease	SDHA	P18	Cryptochlorogenic acid glucoside
Alzheimer’s disease	SDHA	P20	Ferulic acid 4-O-glucoside
Alzheimer’s disease	SDHA	P28	Prunin
Alzheimer’s disease	SDHA	P29	Naringenin 4'-O-glucoside
Alzheimer’s disease	SDHA	P31	Rutin
Alzheimer’s disease	SDHA	P33	Kaempferol-3-O-rutinoside
Alzheimer’s disease	SDHA	P7	Protocatechuic acid 3-O-glucoside
Alzheimer’s disease	SDHA	P8	Neochlorogenic acid glucoside
Alzheimer’s disease	SDHA	P9	Caffeic acid 3-O-glucoside
Alzheimer’s disease	MAPK1	P10	Chlorogenic acid glucoside
Alzheimer’s disease	MAPK1	P11	Neochlorogenic acid
Alzheimer’s disease	MAPK1	P13	Chlorogenic acid
Alzheimer’s disease	MAPK1	P15	Esculetin
Alzheimer’s disease	MAPK1	P16	Melilotoside
Alzheimer’s disease	MAPK1	P17	Caffeic acid
Alzheimer’s disease	MAPK1	P18	Cryptochlorogenic acid glucoside
Alzheimer’s disease	MAPK1	P19	trans-cryptochlorogenic acid
Alzheimer’s disease	MAPK1	P20	Ferulic acid 4-O-glucoside
Alzheimer’s disease	MAPK1	P28	Prunin
Alzheimer’s disease	MAPK1	P29	Naringenin 4'-O-glucoside
Alzheimer’s disease	MAPK1	P31	Rutin
Alzheimer’s disease	MAPK1	P32	Quercetin
Alzheimer’s disease	MAPK1	P33	Kaempferol-3-O-rutinoside
Alzheimer’s disease	MAPK1	P35	Petunidin
Alzheimer’s disease	MAPK1	P7	Protocatechuic acid 3-O-glucoside
Alzheimer’s disease	MAPK1	P8	Neochlorogenic acid glucoside
Alzheimer’s disease	MAPK1	P9	Caffeic acid 3-O-glucoside
Alzheimer’s disease	GRIN2B	P23	N-Acetyl-L-tryptophan
Alzheimer’s disease	GRIN2B	P26	Leucine
Alzheimer’s disease	GRIN2A	P23	N-Acetyl-L-tryptophan
Alzheimer’s disease	GRIN2A	P26	Leucine
Alzheimer’s disease	GRIN1	P1	L-Aspartic acid, 4-β-D-glucopyranosyl ester
Alzheimer’s disease	GRIN1	P14	6-Hydroxycoumarin
Alzheimer’s disease	GRIN1	P2	(1ξ)-1-C-Amino-L-iditol
Alzheimer’s disease	GRIN1	P23	N-Acetyl-L-tryptophan
Alzheimer’s disease	GRIN1	P26	Leucine
Alzheimer’s disease	CASP3	P23	N-Acetyl-L-tryptophan
Alzheimer’s disease	CALM1	P23	N-Acetyl-L-tryptophan
Alzheimer’s disease	ATP5B	P11	Neochlorogenic acid
Alzheimer’s disease	ATP5B	P12	Umbelliferone
Alzheimer’s disease	ATP5B	P13	Chlorogenic acid
Alzheimer’s disease	ATP5B	P14	6-Hydroxycoumarin
Alzheimer’s disease	ATP5B	P15	Esculetin
Alzheimer’s disease	ATP5B	P16	Melilotoside
Alzheimer’s disease	ATP5B	P17	Caffeic acid
Alzheimer’s disease	ATP5B	P19	trans-cryptochlorogenic acid
Alzheimer’s disease	ATP5B	P20	Ferulic acid 4-O-glucoside
Alzheimer’s disease	ATP5B	P28	Prunin
Alzheimer’s disease	ATP5B	P29	Naringenin 4'-O-glucoside
Alzheimer’s disease	ATP5B	P30	Naringenin
Alzheimer’s disease	ATP5B	P31	Rutin
Alzheimer’s disease	ATP5B	P32	Quercetin
Alzheimer’s disease	ATP5B	P33	Kaempferol-3-O-rutinoside
Alzheimer’s disease	ATP5B	P35	Petunidin
Alzheimer’s disease	ATP5B	P6	Salicylic acid
Alzheimer’s disease	ATP5B	P7	Protocatechuic acid 3-glucoside
Alzheimer’s disease	ATP5B	P9	Caffeic acid 3-O-glucoside
Alzheimer’s disease	ATP5A1	P11	Neochlorogenic acid
Alzheimer’s disease	ATP5A1	P12	Umbelliferone
Alzheimer’s disease	ATP5A1	P13	Chlorogenic acid
Alzheimer’s disease	ATP5A1	P14	6-Hydroxycoumarin
Alzheimer’s disease	ATP5A1	P15	Esculetin
Alzheimer’s disease	ATP5A1	P16	Melilotoside
Alzheimer’s disease	ATP5A1	P17	Caffeic acid
Alzheimer’s disease	ATP5A1	P19	trans-cryptochlorogenic acid
Alzheimer’s disease	ATP5A1	P20	Ferulic acid 4-O-glucoside
Alzheimer’s disease	ATP5A1	P28	Prunin
Alzheimer’s disease	ATP5A1	P29	Naringenin 4'-O-glucoside
Alzheimer’s disease	ATP5A1	P30	Naringenin
Alzheimer’s disease	ATP5A1	P31	Rutin
Alzheimer’s disease	ATP5A1	P32	Quercetin
Alzheimer’s disease	ATP5A1	P33	Kaempferol-3-O-rutinoside
Alzheimer’s disease	ATP5A1	P35	Petunidin
Alzheimer’s disease	ATP5A1	P6	Salicylic acid
Alzheimer’s disease	ATP5A1	P7	Protocatechuic acid 3-O-glucoside
Alzheimer’s disease	ATP5A2	P9	Caffeic acid 3-O-glucoside
